# Supplementary material for: Quantifying the financial burden of households’ out-of-pocket payments on medicines in India: a repeated cross-sectional analysis of National Sample Survey data, 1994–2014
Source: PubMed Central journal article supplement (PMC5988077; doi:10.1136/bmjopen-2017-018020), 2018-05-31
Supplement: bmjopen-2017-018020.draft_revisions.pdf [file bmjopen-2017-018020.draft_revisions.pdf]

# BMJ Open

BMJ Open is committed to open peer review. As part of this commitment we make the peer review history of every article we publish publicly available.

When an article is published we post the peer reviewers' comments and the authors' responses online. We also post the versions of the paper that were used during peer review. These are the versions that the peer review comments apply to.

The versions of the paper that follow are the versions that were submitted during the peer review process. They are not the versions of record or the final published versions. They should not be cited or distributed as the published version of this manuscript.

BMJ Open is an open access journal and the full, final, typeset and author-corrected version of record of the manuscript is available on our site with no access controls, subscription charges or pay-per-view fees (<http://bmjopen.bmj.com>).

If you have any questions on BMJ Open's open peer review process please email [info.bmjopen@bmj.com](mailto:info.bmjopen@bmj.com)

# BMJ Open

## Financial burden of medicine out of pocket payments: Implications for living status of Indian households

|                                 |                                                                                                                                                                                                               |
|---------------------------------|---------------------------------------------------------------------------------------------------------------------------------------------------------------------------------------------------------------|
| Journal:                        | <i>BMJ Open</i>                                                                                                                                                                                               |
| Manuscript ID                   | bmjopen-2017-018020                                                                                                                                                                                           |
| Article Type:                   | Research                                                                                                                                                                                                      |
| Date Submitted by the Author:   | 03-Jun-2017                                                                                                                                                                                                   |
| Complete List of Authors:       | Selvaraj, Sakthivel; Public Health Foundation of India, Farooqui, Habib; Public Health Foundation of India, Karan, Anup; Indian Institute of Public Health, Delhi (IIPHD), Public Health Foundation of India, |
| <b>Primary Subject Heading</b>: | Health economics                                                                                                                                                                                              |
| Secondary Subject Heading:      | Health policy, Health economics                                                                                                                                                                               |
| Keywords:                       | out of pocket, poverty, catastrophe, medicine                                                                                                                                                                 |
|                                 |                                                                                                                                                                                                               |

SCHOLARONE™  
Manuscripts

Peer Review Only

**Title page**

Title of the article:

Financial burden of medicine out of pocket payments: Implications for living status of Indian households

Full name, postal address, e-mail and telephone number of the corresponding author:

Dr. Habib Hasan Farooqui, MD

Associate Professor

Address: Public Health Foundation of India, Plot No. 47, Sector 44, Institutional Area, Gurugram, India -122001

Email: drhabibhasan@gmail.com

Phone: +91 9999984673

Full name, department, institution, city and country of all co-authors:

Dr. Sakthivel Selvaraj, PhD

Director,

Address: Public Health Foundation of India, Plot No. 47, Sector 44, Institutional Area, Gurugram, India -122001

Dr. Habib Hasan Farooqui, MD

Associate Professor

Address: Public Health Foundation of India, Plot No. 47, Sector 44, Institutional Area, Gurugram, India -122001

Dr. Anup Karan, DPhil

Associate Professor,

Address: Public Health Foundation of India, Plot No. 47, Sector 44, Institutional Area, Gurugram, India -122001

Word count, excluding title page, abstract, references, figures and tables;

3582 words,

## Financial burden of medicine out of pocket payments: Implications for living status of Indian households

**Objective:** The objective of this research is to generate new evidence on financial implications of medicine out of pocket (OOP) payments for households. We also report disease conditions separately in outpatient and inpatient care, which caused significant increase in OOP expenses.

**Setting:** All Indian States including Union Territories, 1993-94 to 2014

**Design:** Repeated cross section analysis

**Data:** Secondary data of nationwide Consumer Expenditure Surveys for the years 1993-94, 2004-05 and 2011-12 and one wave of Social Consumption: Health for the year 2014 from National Sample Survey Organisation.

**Outcome measure :** Total out-of-pocket expenditure on healthcare and medicine out-of-pocket expenditure on healthcare.

**Results:** Total and medicine out-of-pocket were estimated to be 6.77% [CI: 6.70%, 6.84%] and 4.49% [4.45%, 4.54%] of total consumption expenditure in the year 2011-12 which marked significant increase since 1993-94. These proportions were 11.46% [CI: 11.36%, 11.56%] and 7.60% [CI: 7.54%, 7.67%] respectively of non-food expenditure in the same year. Total and medicine OOP were catastrophic for 17.9% [CI: 17.7%, 18.2%] and 11.2% [11.0%, 11.4%] households respectively in 2011-12 at the 10% of total consumption expenditure threshold implying 29 million households incurred catastrophic out-of-pocket payments in the year 2011-12. Further medicine out-of-pocket pushed 3.09% [CI: 2.99%, 3.20%], implying 38 million, persons into poverty in the year 2011-12. Among the main diseases which caused major out-of-pocket payments are cancers, cardiac, geneto-urinary and metal disorder conditions. Average monthly medicine OOP was invariably higher in outpatient care compared to inpatient care.

**Conclusions:** Government intervention in terms of public provisioning of free medicine has potential to significantly reduce the medicine related OOP as well as total OOP.

Key words: India, out of payment, medicine, catastrophe, poverty

## Article summary

### Strengths and limitations of this study

1. The study used multiple points of time and nationally representative data set to highlight the burden of medicine out-of-pocket expenditure incurred by households;
2. This study is the first one to produce evidence on catastrophic and poverty impact of out-of-pocket payments for medicine
3. The paper links medicine out-of-pocket payments by households with disease conditions and identify types of disease conditions which trigger medicine out-of-pocket payments
4. The study also highlights for the first time that out-of-pocket payments on medicines in outpatient care is far greater burden for households than expenditure on hospitalisation care
5. The study has limitations in terms of using arbitrary cut-off for measuring catastrophic payments
6. Self-reported disease conditions and related out-of-pocket expenditure is an obvious limitation of the study.

## Background

Households' in India bear significant financial burden due to treatment, as prepayment and risk pooling mechanisms are inadequate. Since both government funding and social health insurance contributions are insufficient to meet health care needs of households, over three-fourth of overall health care payments are paid out-of-pocket (OOP) at the point of service delivery and medicine purchase account for the single largest component of these payments<sup>1</sup>. Such spending has dominated over the years, which has pushed significant proportion of population impoverished while a higher proportion of households have incurred catastrophic spending due to OOP payments<sup>2-4</sup>.

The unpredictable and catastrophic nature of illness can throw households into the vortex of poverty. The predicament of high OOP could result in liquidation of assets, heavy borrowing, running down savings, etc. Evidence suggests that households' OOP expenditure pulls down a vast chunk of population below poverty line<sup>2,5-8</sup>. Similarly, recent findings documented the burden of catastrophic spending of health care on households owing to high OOP share to total households' resources<sup>6,9,10</sup>. In the Indian context, several studies in the past confirmed high OOP in general and OOP on medicine in particular. Estimates of impoverishment due to OOP vary widely depending upon the methods and year in which the estimates were made. The number of households falling below poverty line was in the range of 32-39 million per annum during the period 2004<sup>2,5-7</sup>. Such evidence is no surprise given the fact that in India, OOP expenditures are approximately three quarters of total health expenditure<sup>1,11</sup>.

Available evidence reveals that large proportions of population belonging to poor households forego formal treatments owing to family budget constraint. Further, it confirms earlier findings that a substantial burden of OOP is due to outpatient care while the financial burden caused by inpatient care episodes are to the extent of little over one-fifth, and the remaining four-fifth due to outpatient care visits<sup>5</sup>. Another study demonstrated that medicines purchase alone constituted over 70 percent of overall OOP payments. Further, it showed that by simply removing OOP payments for inpatient care resulted in a negligible decline in poverty headcount ratio and poverty gap. Interestingly, the research also demonstrated that by deducting OOPs payments for outpatient care or medicines, the percent of people falling below poverty worked out to just 0.5%<sup>12</sup>.

Using the method of impoverishment to measure affordability, one study assessed the impoverishment effect of medicines purchases by households in 16 low-and-middle income economies<sup>13</sup>. Comparing four key medicine prices to household income in 16 nations, and using World Bank poverty levels of US\$ 1.25 or US\$ 2 per day, the study concluded that a substantial number of people are brought to bear financial burden due to unaffordability of medicines. In Philippines, it was pointed out that an originator brand atenolol purchase by individuals would push an additional 22% of population below the US\$ 1.25 per day

1  
2  
3 measurement while even a generic equivalent of atenolol was likely to push about 7% of  
4 population below poverty levels <sup>14</sup>.  
5

6  
7 Available evidence, both global and Indian, provides insights about the incidence of  
8 catastrophic payments and impoverishment impact of a high and rising households OOP.  
9 The literature on equity dimensions involving both catastrophe and impoverishment has  
10 attempted to address complex methodological and statistical approaches in measurements.  
11 The focus of this research, on the other hand, is to explore the consequences of high  
12 households' medicines spending, since a large share of households' OOP is often incurred  
13 on purchasing drugs. Further, we attempt to investigate which disease conditions are  
14 contributing to high financial burden on households' medicines spending. We attempted to  
15 answer - what is the contribution of medicine OOP by households in total OOP payments,  
16 catastrophic and poverty headcounts? And which disease conditions cause relatively higher  
17 financial disruption in the living status of households?  
18  
19  
20  
21  
22

### 23 **Materials and methods**

#### 24 **Data**

25 The study used secondary data from three waves of nationally representative 'Consumer  
26 Expenditure Surveys' (CES): 1993-94, 2004-05 and 2011-12, conducted by the National  
27 Sample Survey Organisation (NSSO). In addition, health and morbidity survey (HMS) 2014 of  
28 the NSSO was used for disease level classifications of OOP burden. While the sample of size  
29 of CES varied between 100,000 to 125,000 thousand households across different rounds,  
30 the sample size in HMS 2014 was approximately 72,000 households.  
31  
32  
33

34 The CES collect socioeconomic and demographic information on households, but its key  
35 focus is on household spending on roughly 350 food and non-food items. Out-of-pocket  
36 medical expenses incurred by households are separately recorded for inpatient and  
37 outpatient services. The recall periods are one-year and 30-days for inpatient and  
38 outpatient expenses, respectively. HMS collects detailed information on morbidity types,  
39 utilisation pattern and expenditure by households incurred due to utilisation of healthcare.  
40 HMS too separately records expenditure for inpatient and outpatient. However, unlike in  
41 CES the recall period for outpatient in HMS is 15 days.  
42  
43  
44  
45

46 Both CES and are repeated cross-section surveys and are representative at the national and  
47 state levels. In most cases, all districts of a state are included for sampling purposes.  
48 Households in CES are sampled evenly in quarterly sub-rounds beginning on 1 July and  
49 ending on 30 June of the following year, with equal numbers of households allotted in each  
50 quarterly sub-round, to address seasonality. In HMS, survey was completed in only two sub-  
51 rounds starting January1 to June 30, 2014. All estimates in the present paper are sample  
52 weighted.  
53  
54  
55  
56  
57  
58  
59  
60

### Outcome indicators

Using CES we estimated 4 household-level indicators of the financial burden of illness: i) per household member monthly OOP spending on medicines (inflation-adjusted), ii) OOP spending on medicines as a share of total household and non-food spending, and iii) percentage of households reporting catastrophic payments on medicines and iv) percentage of households slipping onto poverty after netting out medicines OOP from households' total consumption expenditure. Instead of sticking to a particular threshold, we considered a range of thresholds for assessing catastrophic expenditure<sup>24915</sup>. We also considered alternative thresholds as medicine OOP spending as a share of household non-food expenditure. For OOP induced poverty estimates we used two different poverty lines: i) Indian official state-specific poverty line<sup>16</sup> and ii) international poverty line based on US \$ 1 per day per person adjusted to US \$ 1.9 purchasing power parity (PPP) per day per person for the year 2011-12<sup>17</sup>. Details of the method used for catastrophic and poverty estimates are presented in [Appendix I](#).

In addition, we used NSSO 2014 HMS data for estimating disease level total and medicine OOP spending separately for inpatient and outpatient. Unlike CES, OOP spending in NSSO 2014 has not been recorded as part of the total household consumption expenditure and instead of estimating disease-wise catastrophic headcount, we present distribution of disease conditions based on incidence of occurrence and range of OOP spending separately for outpatient (15 days recall converted for 30 days) and inpatient (365 days recall converted for 30 days). This helped identifying disease conditions, separately for outpatient and inpatient, which are high frequency of occurrence and greater incidence of OOP spending.

### Results

First, we present basic financial burden indicators for the years 1993-94, 2004-05 and 2011-12 in Table 1. Over 80 percent of populations are reportedly spending out-of-pocket while seeking treatment, during 2011-12. The proportion of population reporting any OOP payments have increased sharply from about 60 percent during 1993-94 to 80 percent in 2011-12. In respect to medicines spending, approximately every OOP spending is associated with expenditure on medicines. There was a significant increase (more than 50%) in household's total consumption expenditure in real terms from INR 517 in 1993-84 to INR 794 in 2011-12. However, during the same period total OOP increased by more than 100% from INR 26 in 1993-94 to INR 54 in 2011-12 in real terms. The increase in OOP on medicine has been more than 70% during the same period. Consequently, the share of spending on health from households' overall consumption expenditure have registered sharp increase during the past two decades, from a moderate 4.8 percent during 1993-94 to nearly seven percent in 2011-12. If we were to net out food expenditure from overall household spending, which are considered a necessity, the share of health spending remained stagnant



but as high as 11-12 percent during the period under consideration. It may be observed that in 2011-12 medicines alone contributed up to 67% of the total OOP.

Table 1: Financial burden indicators, India, 1993-94, 2004-05 and 2011-12

| Financial burden indicators                                     | 1993-94              | 2004-05              | 2011-12              |
|-----------------------------------------------------------------|----------------------|----------------------|----------------------|
| <b>Percentage households reporting oops</b>                     |                      |                      |                      |
| total oops                                                      | 59.2 [58.9, 59.5]    | 64.4 [64.2, 64.7]    | 80.5 [80.2, 80.7]    |
| medicines oops                                                  | 57.5 [57.3, 57.8]    | 63.6 [63.3, 63.8]    | 79.0 [78.8, 79.3]    |
| <b>Monthly per capita expenditure (INR)</b>                     |                      |                      |                      |
| total consumption expenditure (current prices)                  | 317 [315, 318]       | 712 [708, 715]       | 1627 [1617, 1636]    |
| total consumption expenditure (constant 1999-2000 prices)       | 517 [ ]              | 619 [616, 622]       | 794 [790, 799]       |
| total out-of-pocket expenditure (current prices)                | 15.7 [15.4, 16.0]    | 41.8 [41.1, 42.6]    | 111.2 [109.1, 113.3] |
| total out-of-pocket expenditure (constant 1999-2000 prices)     | 25.59 [ ]            | 36.3 [35.7, 37.0]    | 54.3 [53.3, 55.3]    |
| medicines out-of-pocket expenditure (current prices)            | 12.8 [12.6, 13.0]    | 29.8 [29.3, 30.2]    | 73.9 [72.5, 75.3]    |
| medicines out-of-pocket expenditure (constant 1999-2000 prices) | 20.86 [ ]            | 26.0 [25.6, 26.4]    | 36.1 [35.5, 36.8]    |
| <b>Share of health to total household expenditure (%)</b>       |                      |                      |                      |
| share of total out-of-pocket expenditure                        | 4.84 [4.78, 4.91]    | 5.78 [5.72, 5.83]    | 6.77 [6.70, 6.84]    |
| share of total medicines out-of-pocket expenditure              | 3.93 [3.87, 3.98]    | 4.10 [4.06, 4.14]    | 4.49 [4.45, 4.54]    |
| <b>Share of health to non-food household expenditure (%)</b>    |                      |                      |                      |
| share of oops to non-food expenditure                           | 12.37 [12.20, 12.55] | 10.82 [10.72, 10.91] | 11.46 [11.36, 11.56] |
| share of medicines oops to non-food expenditure                 | 10.02 [9.88, 10.17]  | 7.68 [7.62, 7.75]    | 7.60 [7.54, 7.67]    |

Note: numbers in brackets are 95% confidence interval

The households' financial burden on account of distress in OOP payments leads to i) impoverishment and ii) catastrophe. In Table 2 we present a set of catastrophic thresholds measured as a share of OOP to total household consumption expenditure and non-food expenditure. Estimates are presented for both overall OOP as well as OOPs underlying medicines expenditure of households. Further, we define catastrophic measures at different thresholds.

**Table 2: Percentage of households incurring catastrophic payments with respect to total OOP and medicines spending, India, 1993-94, 2004-05 and 2011-12**

| Financial Health Equity Measurements                   | 1993-94              | 2004-05              | 2011-12              | Estimated number of households (2011-12) |
|--------------------------------------------------------|----------------------|----------------------|----------------------|------------------------------------------|
| <b>Thresholds using on total household expenditure</b> |                      |                      |                      |                                          |
| total OOP > 5%                                         | 26.9<br>[26.6, 27.1] | 28.7<br>[28.5, 30.0] | 35.3<br>[35.0, 35.6] | 9,01,07,225                              |
| total OOP > 10%                                        | 13.9<br>[13.8, 14.2] | 14.6<br>[14.4, 14.8] | 17.9<br>[17.7, 18.2] | 4,56,91,766                              |
| total OOP > 25%                                        | 3.9 [3.8, 4.0]       | 3.5 [3.4, 3.6]       | 4.3 [4.2, 4.4]       | 1,09,76,234                              |
| medicines OOP > 5%                                     | 23.3<br>[23.0, 23.5] | 23.4<br>[23.2, 23.6] | 27.0<br>[26.7, 27.2] | 6,89,20,540                              |
| medicines OOP > 10%                                    | 11.5<br>[11.3, 11.7] | 10.2<br>[10.2, 10.4] | 11.2<br>[11.0, 11.4] | 2,85,89,261                              |
| medicines OOP > 25%                                    | 02.9 [2.8, 2.9]      | 1.6 [1.5, 1.7]       | 1.8 [1.7, 1.9]       | 45,94,703                                |
| <b>Thresholds using on non-food expenditure</b>        |                      |                      |                      |                                          |
| total OOP > 5%                                         | 47.8<br>[47.5, 48.1] | 46.5<br>[46.2, 46.8] | 53.5<br>[53.2, 53.8] | 13,65,64,775                             |
| total OOP > 10%                                        | 34.8<br>[34.6, 35.1] | 31.0<br>[30.7, 31.2] | 34.9<br>[34.7, 35.2] | 8,90,86,180                              |
| total OOP > 25%                                        | 16.7<br>[16.5, 16.9] | 11.4<br>[11.2, 11.5] | 11.9<br>[11.7, 12.1] | 3,03,76,090                              |
| total OOP > 40%                                        | 9.7 [9.5, 9.9]       | 4.7 [4.6, 4.9]       | 4.9 [4.8, 5.0]       | 1,25,07,802                              |
| medicines OOP > 5%                                     | 44.7<br>[44.4, 45.0] | 42.5<br>[42.2, 42.8] | 46.4<br>[46.1, 46.7] | 11,84,41,225                             |
| medicines OOP > 10%                                    | 31.2<br>[31.0, 31.5] | 25.5<br>[25.3, 25.7] | 26.1 25.9,<br>26.4]  | 6,66,23,189                              |
| medicines OOP > 25%                                    | 13.9<br>[13.7, 14.1] | 7.1 [7.0, 7.3]       | 6.3 [6.1, 6.4]       | 1,60,81,459                              |
| medicines OOP > 40%                                    | 7.8 [7.6, 7.9]       | 2.2 [2.1, 2.3]       | 1.8 [1.7, 1.9]       | 45,94,703                                |

At the lowest cut-off level of five percent, over one-third of Indian households incurred OOP payments in 2011-12. This percentage was lower in 1993-94 (27%) and 2004-05 (28%). At the 25% threshold of total household expenditure, over 4% households reported incurring OOP in 2011-12, which again registered increasing trend during the last two decades. This essentially implies approximately 11 million Indian households in 2011-12 incurred OOP payments, which is more than 25% of their total household expenditure. Out of these more than 4.4 million households incurred such payments only on account of purchase of medicines. At a lower threshold of 10% of THE, the number of households facing catastrophe is approximately 46 millions, of which 29 million households incurred catastrophe on account of OOP on medicines. Considering only non-food expenditure of households as the basic living status variable, approximately similar number of households incurred medicine OOP in 2011-12, which is as high as 40% of their non-food expenditure.

**Table 3: Impoverishment Indicators due to Households' OOP on Medicines, India, 1993-94, 2004-05 and 2011-12**

|                                           | 1993-94              | 2004-05              | 2011-12              | Estimated population (2011-12) |
|-------------------------------------------|----------------------|----------------------|----------------------|--------------------------------|
| <b>Using national poverty line*</b>       |                      |                      |                      |                                |
| Gross Headcount                           | 45.32 [45.03, 45.61] | 37.85 [37.58, 38.12] | 22.17 [21.92, 22.43] | 27,19,03,356                   |
| Headcount net of total OOP                | 49.52 [49.22, 49.81] | 42.68 [42.40, 42.95] | 26.65 [26.38, 26.92] | 32,68,48,193                   |
| Total OOP induced poverty                 | 4.20 [4.07, 4.30]    | 4.83 [4.71, 4.94]    | 4.48 [4.35, 4.60]    | 5,49,44,837                    |
| Headcount net of medicine OOP             | 48.91 [48.61, 49.20] | 41.54 [41.27, 41.82] | 25.27 [25.00, 25.53] | 30,99,23,221                   |
| Medicine OOP induced poverty              | 3.59 [3.47, 3.69]    | 3.69 [3.59, 3.80]    | 3.09 [2.99, 3.20]    | 3,78,97,220                    |
| <b>Using international poverty line**</b> |                      |                      |                      |                                |
| Gross Headcount                           | 40.96 [40.67, 41.24] | 33.07 [32.81, 33.34] | 18.37 [18.13, 18.61] | 22,52,98,360                   |
| Headcount net of total OOP                | 44.92 [44.63, 45.21] | 37.38 [37.11, 37.65] | 22.41 [22.16, 22.67] | 27,48,46,829                   |

|                               |                      |                      |                      |              |
|-------------------------------|----------------------|----------------------|----------------------|--------------|
| Total OOP induced poverty     | 3.96 [3.85, 4.08]    | 4.31 [4.19, 4.42]    | 4.04 [3.92, 4.16]    | 4,95,48,469  |
| Headcount net of medicine OOP | 44.35 [44.06, 44.64] | 36.34 [36.08, 36.61] | 21.37 [21.11, 21.62] | 26,20,91,778 |
| Medicine OOP induced poverty  | 3.39 [3.29, 3.50]    | 3.27 [3.17, 3.68]    | 2.99 [2.89, 3.10]    | 3,66,70,773  |

Notes: based on Tendulkar Committee methods; \*\* using USD 1.90 PPP at 2011-12 prices and mixed recall period of household consumption expenditure

Next, we present implications of OOP payments on poverty estimates. To facilitate interpretation, we present 3 basic indicators: i) gross headcount – percentage of population below poverty line, ii) headcount net of OOP – percentage of population below poverty line after netting out OOP from household consumption expenditure and iii) OOP induced poverty which is the difference of the first two reflecting rise in poverty ratio owing to OOP. The last two indicators are presented separately for total OOP and medicine OOP. All these indicators are estimate using Indian official poverty line (Tendulkar Committee method) and international poverty line of US \$ 1.90 PPP.

The difference in mean headcount measure of gross and net poverty ratio, reflects the percentage of population falling below poverty line because of households' OOP on health care. The percentage of headcount of households impoverished due to OOP was 3.97 percent during 1993-94, which increased to 4.30 percent in 2004-05 while in 2011-12 it was at 4.04 percent, as per international poverty line. In terms of Indian state-specific official poverty line, it may be observed that owing to OOP the percentage of households falling below poverty line increased from 4.19 percent in 1993-94 to 4.48 percent in 2011-12. This implies that close to 55 million persons in 2011-12 were pushed into poverty mainly because of OOP payments to healthcare. Out of this approximately 38 million became poor only because OOP payments on purchasing medicines. Using the same measurement, the headcount measure for households OOP on medicines slightly declined from 3.58 percent in 1993-94 to 3.09 percent during 2011-12 using the international poverty line. Two trends stand out clearly from the findings. Impoverishment arising out of households' OOP is rather high and continued to be so during the last two decades. Moreover, the burden of impoverishment arising out of households' OOP on medicines appears to be highest, where three fourth of all health impoverishment is due to medicines spending by households.

#### OOP expenditure by disease conditions

We also conducted a disaggregated analysis on disease wise expenditure not only with reference to total OOP and medicine OOP but also by type of care - inpatient versus out patient. Most common health condition for seeking outpatient care and inpatient care was

1  
2  
3 fever (22.7%) and childbirth (22.3%). In addition, our estimates suggest that cancer had the  
4 highest monthly total OOP per capita both for inpatient (INR 5054) and outpatient (INR  
5 5121) care followed by injuries (INR 3045) for outpatient care and cardiac events (INR 2808)  
6 for inpatient care.  
7

8  
9 Since, medicines OOP contribute significantly to catastrophe of households as highlighted  
10 above, we mapped disease wise expenditure, frequency of utilization and type of care to  
11 generate a holistic scenario to explain how not only hospitalization but outpatient care for  
12 majority of the disease also leads to catastrophe and impoverishment (Figure 1). For  
13 example, our estimates suggest that per capita medicine OOP for cancer care was  
14 significantly higher in outpatient care as compared to the inpatient care. However, as far as  
15 total OOP is concerned, it is almost similar and high both for inpatient and outpatient. In  
16 contrast, in case of cardio, medicine OOP is similar both for inpatient and outpatient but  
17 total OOP is significantly higher for inpatient treatment compared to outpatient treatment.  
18 In case of gastro, however, both medicine OOP and total OOP both are higher for outpatient  
19 compared to inpatient treatment. Similarly, for mental disorder medicine OOP is higher for  
20 outpatient compared to inpatient but total OOP is almost similar both for outpatient and  
21 inpatient. In general, average monthly medicine OOP was consistently higher for outpatient  
22 care as compared to inpatient cares for majority of disease condition and coupled with  
23 higher frequency for outpatient care this is resulting into high incidence of catastrophe. The  
24 catastrophic nature of outpatient expenditure is also reflected at the household level.  
25  
26  
27  
28  
29  
30

31  
32 We plotted outpatient and inpatient total OOP and medicine OOP in relation to households  
33 'usual' consumption expenditure (Figure 2). For a number of households, average monthly  
34 outpatient expenditure is not only significantly higher in relation to household's non-  
35 medical consumption expenditure but also frequency of such events is higher in outpatient  
36 care as compared to inpatient care. The concentration of red (total OOP) and green  
37 (medicine OOP) spikes above the consumption expenditure on the right hand side of the  
38 graph reflects this scenario succinctly.  
39  
40  
41

## 42 **Discussion and conclusion**

43  
44  
45 We demonstrated through a well-defined approach of measuring health cost burden on  
46 households that medicines OOP payments by households leads to impoverishment and  
47 catastrophe. Although evidence exist both in global and Indian literature on catastrophic  
48 and impoverishing nature of household's OOP, to the best of our knowledge this research  
49 work is the first attempt to capture impoverishing effect of OOP payments on account of  
50 medicine OOP in both outpatient and inpatient setting involving disease conditions. We  
51 observed that households' OOP is not only high in India but continues to remain so for over  
52 two decades. Also, the spending on medicines accounted for the largest share of OOP,  
53 accounting for over two-thirds of households' payments on health care. Applying a 10%  
54  
55  
56  
57  
58  
59  
60

1  
2  
3 threshold of OOPs on overall consumption expenditure, an estimated 18 percent of Indian  
4 households appear to suffer financial catastrophe. In respect to medicines OOP, at similar  
5 threshold, an estimated 11 percent of Indian populations are reported to be incurring  
6 catastrophe. This essentially implies that an estimated 46 million households faced  
7 catastrophic expenditure on healthcare in the year 2011-12, if we consider 10% threshold of  
8 household consumption expenditure as catastrophe. Out of this 46 million, 29 million  
9 households incurred such expenditure mainly on account of purchasing medicines.  
10 Impoverishment of households arising out of households' OOP is high and continues to be  
11 so during the last two decades. Measured both by international poverty criteria as well as  
12 Indian state-specific official poverty lines, the burden of impoverishment due to households'  
13 OOP on medicines appears to be significantly high, where three fourth of all health  
14 impoverishment is due to medicines spending. An estimated 55 million population were  
15 pushed into poverty because they had to pay for healthcare. Medicines purchasing alone  
16 contributed to approximately 38 million of this increase in impoverishment.  
17  
18  
19  
20  
21  
22

23 Literature suggest that in India, on an average, the government spending on medicines to be  
24 around 10 percent, several state governments end up spending even less than five percent  
25 of public spending on health care<sup>18</sup>. In addition, except for a couple of Indian states, drug  
26 procurement and distribution system is ineffective leading to acute shortages of key  
27 essential medicines and chronic stock-outs in public health facilities<sup>19-22</sup>. This situation has  
28 resulted in physical unavailability of medicines. Drawing evidence from large sample surveys  
29 for the period from 1986-87 to 2004, it is reported the physical barrier to access to key  
30 essential medicines have worsened during this period. Supply of free drugs in government  
31 health system in the outpatient care setting, declined sharply from about 18 percent in  
32 1986-87 to five percent in 2004. For the same period, drugs prescribed during  
33 hospitalization for free also declined significantly from one-third to about nine percent<sup>18</sup>. As  
34 a result, it is pointed out "the number of hospitalization episodes in which an ailing  
35 population paid out-of-pocket (OOP), has risen dramatically from about 41 percent to close  
36 to 72 percent".  
37  
38  
39  
40  
41  
42

43 Further, it was observed that from the period spanning mid-1990s to 2004, patients visiting  
44 government health facilities did not receive medicines in over one-fourth of outpatient  
45 episodes<sup>23</sup>. In view of inadequate availability of medicines in government health facilities,  
46 households' end up accessing private facilities. Evidence suggests that trend have  
47 sharpened in the last couple of decades. For instance, the percentage of population  
48 accessing private facilities for inpatient and outpatient treatment has increased significantly  
49 between 1986-87 and 2004, households accessing private hospital care increased from  
50 around 40 percent to nearly 60 percent in rural India while urban India reported increase  
51 from 40 percent to 68 percent<sup>24</sup>. For similar period, outpatient care visits in private facilities  
52 remained high at around 75 percent in 1986-87 in rural India and 73 percent in urban India  
53 stepped up to 78 percent and 80 percent respectively for rural and urban India<sup>25</sup>.  
54  
55  
56  
57  
58  
59  
60

1  
2  
3  
4 Although public sector gained some ground by increasing its share in total outpatient care,  
5 private sector continue to dominate both in outpatient and inpatient care in India<sup>23</sup>. As an  
6 increasing share of households access private health facilities, private retail pharmacies  
7 have become a major source of supply of key essential medicines. While availability of  
8 medicines may per se not a challenge, affordability appears to act as barrier<sup>26</sup>. Thus, pricing  
9 of medicines and regulation around retail medicine prices becomes critical in improving  
10 affordability and consequently reducing medicine induced OOP burden. Although India had  
11 a progressive retail price cap policies since 1979, but over the years a policy of deregulation  
12 was followed<sup>27</sup>. In 2013, the Government of India promulgated the Drugs Price Control  
13 Order, 2013 (DPCO, 2013) which primarily brought all essential drugs, based on National List  
14 of Essential Medicines, 2011, under price cap<sup>28</sup>. However, the policy has moved from cost  
15 based pricing to market-based pricing mechanism. An evaluation of new price regulation  
16 has highlighted that, while few of the molecules analyzed (37) had an increase in sales  
17 volume attributable to DPCO, majority of the molecules (52) had a negative impact on their  
18 sales volume due to DPCO. Overall, the DPCO may have had a negative impact in terms of  
19 sales volume of medicines under price control<sup>29</sup>. Given that the sales volume of price  
20 controlled medicines has gone down, households OOP spending may increase on account of  
21 high medicine price in unregulated market.  
22  
23  
24  
25  
26  
27

28  
29 Further, to improve access to health care and to provide financial risk protection to  
30 households, the central government and several state governments have been  
31 implementing a publicly-funded health insurance programs since 2007, whose primary aim  
32 was to provide cashless treatment to economically vulnerable households for  
33 hospitalization episodes. Emerging evidence from micro as well as macro level studies point  
34 to a trend where such insurance schemes appear to have improved access to hospital care  
35 but have been ineffective in preventing catastrophe and impoverishment to households<sup>4 30</sup>  
36  
37  
38  
39  
40  
41  
42  
43  
44  
45  
46  
47  
48  
49  
50  
51  
52  
53  
54  
55  
56  
57  
58  
59  
60  
61  
62  
63  
64  
65  
66  
67  
68  
69  
70  
71  
72  
73  
74  
75  
76  
77  
78  
79  
80  
81  
82  
83  
84  
85  
86  
87  
88  
89  
90  
91  
92  
93  
94  
95  
96  
97  
98  
99  
100  
101  
102  
103  
104  
105  
106  
107  
108  
109  
110  
111  
112  
113  
114  
115  
116  
117  
118  
119  
120  
121  
122  
123  
124  
125  
126  
127  
128  
129  
130  
131  
132  
133  
134  
135  
136  
137  
138  
139  
140  
141  
142  
143  
144  
145  
146  
147  
148  
149  
150  
151  
152  
153  
154  
155  
156  
157  
158  
159  
160  
161  
162  
163  
164  
165  
166  
167  
168  
169  
170  
171  
172  
173  
174  
175  
176  
177  
178  
179  
180  
181  
182  
183  
184  
185  
186  
187  
188  
189  
190  
191  
192  
193  
194  
195  
196  
197  
198  
199  
200  
201  
202  
203  
204  
205  
206  
207  
208  
209  
210  
211  
212  
213  
214  
215  
216  
217  
218  
219  
220  
221  
222  
223  
224  
225  
226  
227  
228  
229  
230  
231  
232  
233  
234  
235  
236  
237  
238  
239  
240  
241  
242  
243  
244  
245  
246  
247  
248  
249  
250  
251  
252  
253  
254  
255  
256  
257  
258  
259  
260  
261  
262  
263  
264  
265  
266  
267  
268  
269  
270  
271  
272  
273  
274  
275  
276  
277  
278  
279  
280  
281  
282  
283  
284  
285  
286  
287  
288  
289  
290  
291  
292  
293  
294  
295  
296  
297  
298  
299  
300  
301  
302  
303  
304  
305  
306  
307  
308  
309  
310  
311  
312  
313  
314  
315  
316  
317  
318  
319  
320  
321  
322  
323  
324  
325  
326  
327  
328  
329  
330  
331  
332  
333  
334  
335  
336  
337  
338  
339  
340  
341  
342  
343  
344  
345  
346  
347  
348  
349  
350  
351  
352  
353  
354  
355  
356  
357  
358  
359  
360  
361  
362  
363  
364  
365  
366  
367  
368  
369  
370  
371  
372  
373  
374  
375  
376  
377  
378  
379  
380  
381  
382  
383  
384  
385  
386  
387  
388  
389  
390  
391  
392  
393  
394  
395  
396  
397  
398  
399  
400  
401  
402  
403  
404  
405  
406  
407  
408  
409  
410  
411  
412  
413  
414  
415  
416  
417  
418  
419  
420  
421  
422  
423  
424  
425  
426  
427  
428  
429  
430  
431  
432  
433  
434  
435  
436  
437  
438  
439  
440  
441  
442  
443  
444  
445  
446  
447  
448  
449  
450  
451  
452  
453  
454  
455  
456  
457  
458  
459  
460  
461  
462  
463  
464  
465  
466  
467  
468  
469  
470  
471  
472  
473  
474  
475  
476  
477  
478  
479  
480  
481  
482  
483  
484  
485  
486  
487  
488  
489  
490  
491  
492  
493  
494  
495  
496  
497  
498  
499  
500  
501  
502  
503  
504  
505  
506  
507  
508  
509  
510  
511  
512  
513  
514  
515  
516  
517  
518  
519  
520  
521  
522  
523  
524  
525  
526  
527  
528  
529  
530  
531  
532  
533  
534  
535  
536  
537  
538  
539  
540  
541  
542  
543  
544  
545  
546  
547  
548  
549  
550  
551  
552  
553  
554  
555  
556  
557  
558  
559  
560  
561  
562  
563  
564  
565  
566  
567  
568  
569  
570  
571  
572  
573  
574  
575  
576  
577  
578  
579  
580  
581  
582  
583  
584  
585  
586  
587  
588  
589  
590  
591  
592  
593  
594  
595  
596  
597  
598  
599  
600  
601  
602  
603  
604  
605  
606  
607  
608  
609  
610  
611  
612  
613  
614  
615  
616  
617  
618  
619  
620  
621  
622  
623  
624  
625  
626  
627  
628  
629  
630  
631  
632  
633  
634  
635  
636  
637  
638  
639  
640  
641  
642  
643  
644  
645  
646  
647  
648  
649  
650  
651  
652  
653  
654  
655  
656  
657  
658  
659  
660  
661  
662  
663  
664  
665  
666  
667  
668  
669  
670  
671  
672  
673  
674  
675  
676  
677  
678  
679  
680  
681  
682  
683  
684  
685  
686  
687  
688  
689  
690  
691  
692  
693  
694  
695  
696  
697  
698  
699  
700  
701  
702  
703  
704  
705  
706  
707  
708  
709  
710  
711  
712  
713  
714  
715  
716  
717  
718  
719  
720  
721  
722  
723  
724  
725  
726  
727  
728  
729  
730  
731  
732  
733  
734  
735  
736  
737  
738  
739  
740  
741  
742  
743  
744  
745  
746  
747  
748  
749  
750  
751  
752  
753  
754  
755  
756  
757  
758  
759  
760  
761  
762  
763  
764  
765  
766  
767  
768  
769  
770  
771  
772  
773  
774  
775  
776  
777  
778  
779  
780  
781  
782  
783  
784  
785  
786  
787  
788  
789  
790  
791  
792  
793  
794  
795  
796  
797  
798  
799  
800  
801  
802  
803  
804  
805  
806  
807  
808  
809  
810  
811  
812  
813  
814  
815  
816  
817  
818  
819  
820  
821  
822  
823  
824  
825  
826  
827  
828  
829  
830  
831  
832  
833  
834  
835  
836  
837  
838  
839  
840  
841  
842  
843  
844  
845  
846  
847  
848  
849  
850  
851  
852  
853  
854  
855  
856  
857  
858  
859  
860  
861  
862  
863  
864  
865  
866  
867  
868  
869  
870  
871  
872  
873  
874  
875  
876  
877  
878  
879  
880  
881  
882  
883  
884  
885  
886  
887  
888  
889  
890  
891  
892  
893  
894  
895  
896  
897  
898  
899  
900  
901  
902  
903  
904  
905  
906  
907  
908  
909  
910  
911  
912  
913  
914  
915  
916  
917  
918  
919  
920  
921  
922  
923  
924  
925  
926  
927  
928  
929  
930  
931  
932  
933  
934  
935  
936  
937  
938  
939  
940  
941  
942  
943  
944  
945  
946  
947  
948  
949  
950  
951  
952  
953  
954  
955  
956  
957  
958  
959  
960  
961  
962  
963  
964  
965  
966  
967  
968  
969  
970  
971  
972  
973  
974  
975  
976  
977  
978  
979  
980  
981  
982  
983  
984  
985  
986  
987  
988  
989  
990  
991  
992  
993  
994  
995  
996  
997  
998  
999  
1000

1  
2  
3 programs governing public health facilities are critical, what is even more vital is the price  
4 cap intervention in the retail segment. The NHP 2017 also highlighted the need for providing  
5 free medicines in public health facilities by stepping up funding and improving drug  
6 procurement and distribution mechanisms<sup>33</sup>. In addition to DPCO, 2013, the present central  
7 government has reduced prices of 200 key essential drugs whose prices were not notified by  
8 DPCO earlier<sup>28</sup>, using a special provision under Para 19 of DPCO to bring more drugs under  
9 price ceiling. A recent pronouncement by the government intends to bring legislation for  
10 physicians to prescribe drugs only in generic names, holds even greater promise for  
11 reducing households' OOP. In summary, government intervention in terms of public  
12 provisioning of free medicine has potential to significantly reduce the medicine related OOP  
13 as well as total OOP.  
14  
15  
16  
17

18  
19 Contributorship: AK and SS conceived the idea, designed the analysis, conducted data  
20 analysis and wrote the first draft of the paper. AK, SS and HHF conducted the literature  
21 review and the interpretation of the results. AS, SS and HHF revised and edited the  
22 manuscript to its final stages. All the authors approved the final manuscript version.  
23  
24

25 Acknowledgments: None  
26  
27

28 Competing Interests: We declare no conflict of interest.  
29  
30

31 Funding: Habib Hasan Farooqui is supported by a Wellcome Trust Capacity Strengthening  
32 Strategic Award to the Public Health Foundation of India and a consortium of UK  
33 universities. The funders had no role in study design, data collection and analysis, decision  
34 to publish, or preparation of the manuscript.  
35  
36

37 Data sharing: The data used for the analysis is available in public domain.  
38  
39

40 Ethical approval: Ethical approval for this study was not needed. The study used only  
41 anonymised data from secondary sources. Requisite permission to use the data has been  
42 obtained from the agency.  
43  
44

45 Reference list:  
46  
47

- 48 1. (NHSRC). NHSRC. National Health Accounts Estimates for India 2013-14: Ministry of  
49 Health and Family Welfare (MoHFW). Government of India, 2014.
- 50 2. Van Doorslaer E ODO, Rannan-Eliya RP, Somanathan A, Adhikari SR, Garg CC, et al. . Effect  
51 of payments for health care on poverty estimates in 11 countries in Asia: an analysis of  
52 household survey data. *The Lancet* 2006;368:1357-64.
- 53 3. Doorslaer EV ODO, Rannan-Eliya RP, Somanathan A, Adhikari SR,, al. e. Catastrophic  
54 payments for health care in Asia. *Health Econ* 2007;16:1159-84.  
55  
56  
57  
58  
59  
60



- 1
- 2
- 3 4. Karan A, Selvaraj S, Mahal A. Moving to universal coverage? Trends in the burden of out-
- 4 of-pocket payments for health care across social groups in India, 1999-2000 to 2011-12. *PLoS*
- 5 *one* 2014;9(8):e105162. doi: 10.1371/journal.pone.0105162
- 6
- 7 5. Berman P AR, Bhandari L. . The impoverishing effect of healthcare payments in India: New
- 8 methodology and findings. . *Economic & Political Weekly* 2010;45:65-71.
- 9
- 10 6. Garg CC KA. Reducing out-of-pocket expenditures to reduce poverty: a disaggregated
- 11 analysis at rural-urban and state level in India. . *Health Policy and planning* ; 2009; 24:116-
- 12 28. .
- 13
- 14 7. Selvaraj S, Karan, A.K. Deepening health insecurity in India: evidence from national
- 15 sample surveys since 1980s. . *Econ Political Wkly* 2009;44:55–60.
- 16
- 17 8. Wagstaff A. The economic consequences of health shocks: evidence from Vietnam.
- 18 . *Health Econ* 2007. ;26 82–100.
- 19
- 20 9. Xu K, Evans, D.B., Kawabata, K., Zeramdini, R., Klavus, J., Murray, C.J.L. Household
- 21 catastrophic health expenditure: a multicountry analysis. *Lancet* 2003;362 111–17.
- 22
- 23 10. Xu K, Evans, D.B., Carrin, G., Aguilar, A.M., Musgrove, P., Evans, T. Protecting households
- 24 from catastrophic health spending. . *Health Aff* 2007;26(972–983.)
- 25
- 26 11. Ministry of Health and Family Welfare (MoHFW) GoI. NCMH: Report of the National
- 27 Commission on Macroeconomics and Health. , 2005.
- 28
- 29 12. Rao KD, Bhatnagar A, Murphy A. Socio-economic inequalities in the financing of
- 30 cardiovascular & diabetes inpatient treatment in India. *Indian J Med Res* 2011;133:57-63.
- 31
- 32 13. Khatib R, McKee M, Shannon H, et al. Availability and affordability of cardiovascular
- 33 disease medicines and their effect on use in high-income, middle-income, and low-income
- 34 countries: an analysis of the PURE study data. *Lancet* 2016;387(10013):61-9. doi:
- 35 10.1016/S0140-6736(15)00469-9
- 36
- 37 14. van Mourik MS, Cameron A, Ewen M, et al. Availability, price and affordability of
- 38 cardiovascular medicines: a comparison across 36 countries using WHO/HAI data. *BMC*
- 39 *Cardiovasc Disord* 2010;10:25. doi: 10.1186/1471-2261-10-25
- 40
- 41 15. Fan VY, Karan A, Mahal A. State health insurance and out-of-pocket health expenditures
- 42 in Andhra Pradesh, India. *Int J Health Care Finance Econ* 2012;12(3):189-215. doi:
- 43 10.1007/s10754-012-9110-5
- 44
- 45 16. Commission. P. Report of the Expert Group to Review the Methodology for
- 46 Measurement of Poverty. New Delhi: Planning Commission, Government of India.
- 47 , 2014.
- 48
- 49 17. Bank W. World Bank 2017 [Available from:
- 50 <http://iresearch.worldbank.org/PovcalNet/FAQs.aspx>; 2017.
- 51
- 52 18. Reddy Kea. High Level Expert Group (HLEG) report on Universal Health Coverage (UHC)
- 53 for India. New Delhi: Public Health Foundation of India, 2011.
- 54
- 55 19. Selvaraj S, Chokshi, M., Hasan, H., & Kumar, P. . Improving Governance and
- 56 Accountability in India's Medicine Supply System. . New Delhi: Public Health Foundation of
- 57 India., 2010.
- 58
- 59
- 60

- 1  
2  
3 20. Prinja S, Bahuguna P, Tripathy JP, et al. Availability of medicines in public sector health  
4 facilities of two North Indian States. *BMC Pharmacol Toxicol* 2015;16:43. doi:  
5 10.1186/s40360-015-0043-8  
6  
7 21. Kotwani A, Gurbani N, Sharma S, et al. Insights for policymakers from a medicine price  
8 survey in Rajasthan. *Indian J Med Res* 2009;129(4):451-4.  
9  
10 22. Kotwani A. Where are we now: assessing the price, availability and affordability of  
11 essential medicines in Delhi as India plans free medicine for all. *BMC health services*  
12 *research* 2013;13:285. doi: 10.1186/1472-6963-13-285  
13  
14 23. Karan A, et al. Key indicators of morbidity, utilization and health expenditure - Tamil  
15 Nadu. New Delhi: Public Health Foundation of India, 2017.  
16  
17 24. Mackintosh M, Channon A, Karan A, et al. What is the private sector? Understanding  
18 private provision in the health systems of low-income and middle-income countries. *Lancet*  
19 2016;388(10044):596-605. doi: 10.1016/S0140-6736(16)00342-1  
20  
21 25. Selvaraj S KA. Deepening health insecurity in India: evidence from national sample  
22 surveys since 1980s. *Econ Polit Wkly* 2009;44:55-60.  
23  
24 26. Kotwani A, Ewen M, Dey D, et al. Prices & availability of common medicines at six sites in  
25 India using a standard methodology. *Indian J Med Res* 2007;125(5):645-54.  
26  
27 27. India Go. Drug Price Control Order 1995. In: Department of Pharmaceuticals MoCaF, ed.  
28 India, 1995.  
29  
30 28. National Pharmaceutical Pricing Authority. Drug Price Control Order 2013. India, 2016.  
31  
32 29. Arvind Sahay SJ. Does Pharmaceutical Price Regulation Result in Greater Access to  
33 Essential Medicines? Study of the impact of drug price control order on sales volume of  
34 drugs in India. Ahmedabad: Indian Institute of Management, 2016.  
35  
36 30. Devadasan N, Seshadri, T., Trivedi, M., Criel, B. Promoting universal financial protection:  
37 evidence from the rashtriya Swasthya Bima Yojana (RSBY) in Gujarat, India. *Health Res*  
38 *Policy Syst* 2013. ;11:1-29.  
39  
40 31. Prinja S, Chauhan AS, Karan A, et al. Impact of Publicly Financed Health Insurance  
41 Schemes on Healthcare Utilization and Financial Risk Protection in India: A Systematic  
42 Review. *PLoS one* 2017;12(2):e0170996. doi: 10.1371/journal.pone.0170996  
43  
44 32. Singh PV, Tatambhotla A, Kalvakuntla R, et al. Understanding public drug procurement in  
45 India: a comparative qualitative study of five Indian states. *BMJ Open* 2013;3(2) doi:  
46 10.1136/bmjopen-2012-001987  
47  
48 33. Ministry of Health and Family Welfare (MoHFW) GoI. NATIONAL HEALTH POLICY, 2017  
49 2017 [Available from: [https://www.nhp.gov.in//NHPfiles/national\\_health\\_policy\\_2017.pdf](https://www.nhp.gov.in//NHPfiles/national_health_policy_2017.pdf).  
50  
51  
52  
53  
54  
55  
56  
57  
58  
59  
60

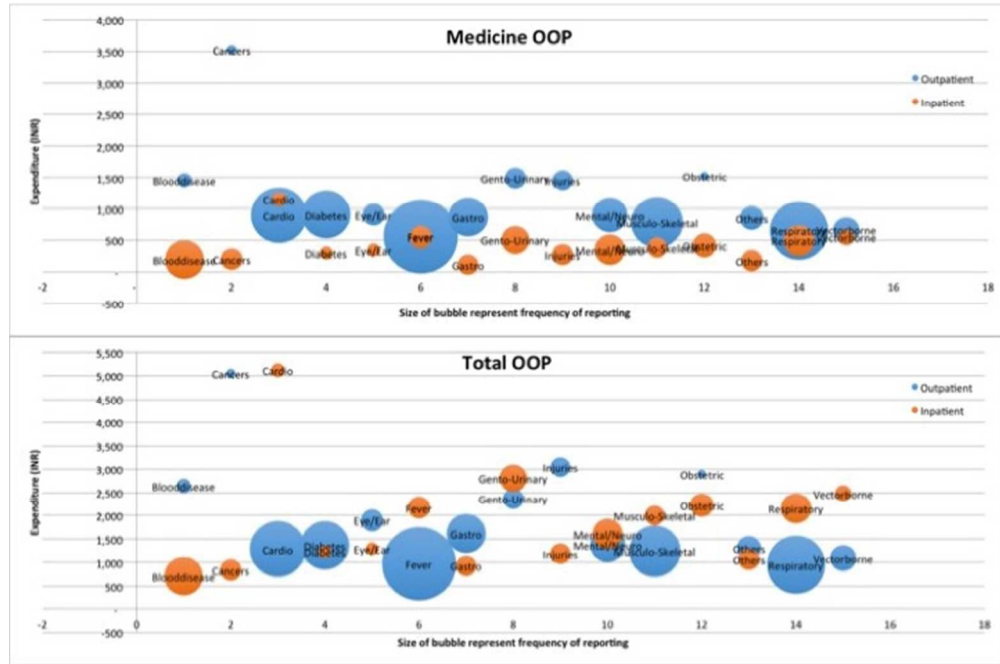

Figure 1: Disease wise average monthly per person medicine OOP and total OOP, 2014

255x178mm (72 x 72 DPI)

Peer review only

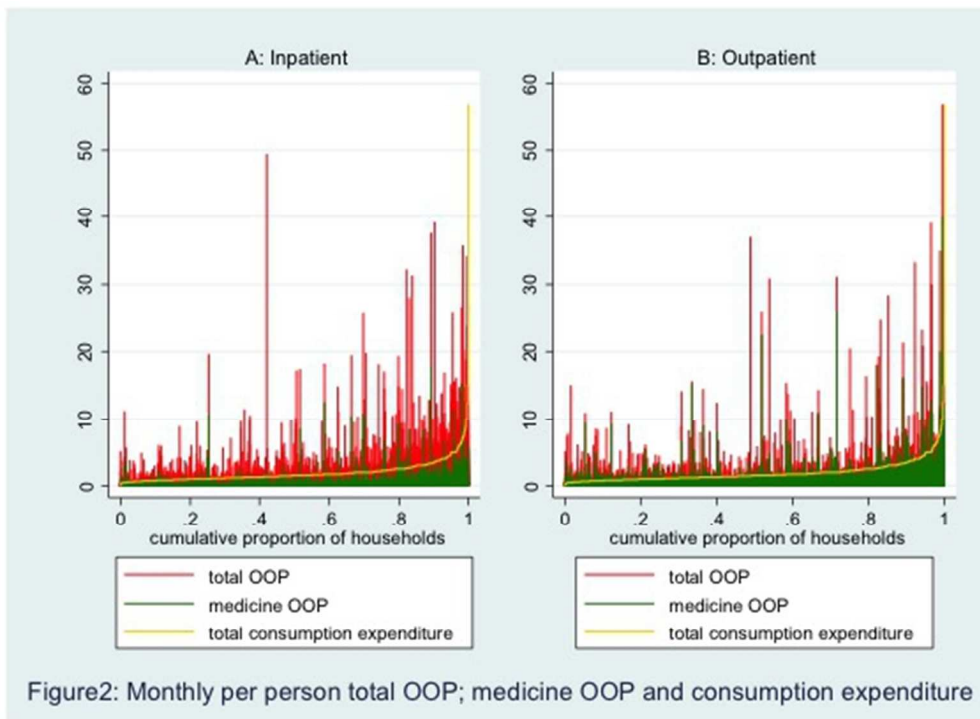

200x146mm (72 x 72 DPI)

Supplementary materials

Annexure I: Estimation of out-of-pocket expenditure indicators

a. Out-of-pocket payments

Total out-of-pocket (OOP) payment has been defined as the summation of all kinds of direct expenditure on purchase of medical care including expenditure on family planning devices and transportation costs to access medical care by households either as inpatient or outpatient. According to the NSSO household questionnaire the main item of expenditure considered for inpatient and outpatient are presented in Table A-I.

Table A-I: Main items of expenditure considered for inpatient and outpatient in the NSSO questionnaire

| Inpatient                           |                                 | Outpatient                          |                                 |
|-------------------------------------|---------------------------------|-------------------------------------|---------------------------------|
| Heads of expenditure                | Item code in NSSO questionnaire | Heads of expenditure                | Item code in NSSO questionnaire |
| medicine                            | 410                             | medicine                            | 420                             |
| X-ray, ECG, pathological test, etc. | 411                             | X-ray, ECG, pathological test, etc. | 421                             |
| doctor's/surgeon's fee              | 412                             | doctor's/ surgeon's fee             | 422                             |
| hospital & nursing home charges     | 413                             | family planning devices             | 423                             |
| other medical expenses              | 414                             | other medical expenses              | 424                             |
| <b>Total inpatient</b>              | <b>419=410-414</b>              | <b>Total outpatient</b>             | <b>429=420-424</b>              |

The reference period of inpatient and outpatient expenditure in the consumer expenditure surveys are 1 year and 1 month respectively. Based on the information presented in Table A-I, total inpatient expenditure, outpatient expenditure and total OOP expenditure were estimated by converting inpatient expenditure for one month. Accordingly, households with any OOP have been defined as households reporting positive OOP (OOP>0) either as inpatient or outpatient or both.

b. Per person monthly OOP

Per person monthly OOP is defined as total monthly OOP divided by household size for each household.

*c. OOP share*

The financial burden of health expenses by households has also been estimated in terms of OOP as a share of total household expenditure and alternatively as a share of total non-food expenditure of households..

$$Sh_{OOP} = T / exp \dots\dots\dots (A.1)$$

Where, 'T' is total OOP payments and 'exp' is household total (non-food) expenditure by households.

*d. Catastrophic payments and headcount*

Further, OOP payments are defined as catastrophic when OOP payments as a portion of total household resources are in excess of a certain threshold. A household is said to have incurred catastrophic payments if  $T/exp > Z$ , where 'T' and OOP are the same as in equation (A.1) and 'Z' is a certain threshold. The latter is arbitrary and in general, estimates are presented for a range of values for z (5, 10, 15, 25 and 40 per cent).

Accordingly, the headcount ratio of catastrophic payment is calculated as follows:

$$cat_i = \frac{1}{n} \sum 1 \left( \frac{T}{exp} > Z_i \right) \dots\dots\dots (A.2)$$

Where,  $Cat_i$  is catastrophic headcounts of households with OOP share exceeding a threshold defined as 'i' per cent of total household total (non-food) expenditure,  $1(.)$  is an indicator function, which takes the value 1 if  $T/exp > Z_i$  is true and 0 otherwise; n is the number of households incurring expenditure on health for various thresholds;  $Z_1, Z_2, Z_3 \dots\dots$  are the respective thresholds of the OOP share.

*d. Poverty headcount*

The usual headcount ratio of poverty is calculated as:

$$pre HP = 1/n \sum 1 (xi \leq PL) \dots\dots\dots (A.3)$$

1  
2  
3  
4  
5  
6  
7  
8  
9  
10  
11  
12  
13  
14  
15  
16  
17  
18  
19  
20  
21  
22  
23  
24  
25  
26  
27  
28  
29  
30  
31  
32  
33  
34  
35  
36  
37  
38  
39  
40  
41  
42  
43  
44  
45  
46  
47

where:  $1(.)$  is a function, taking the value 1 if person belong to a household with consumption expenditure lower the value of poverty line value,  
 $x$ = Household total consumption expenditure;  $PL$ = Poverty Line and  $n$  is total population.

Headcount of poverty after deducting OOP from household consumption expenditure can be defined as:

$$post\ HP = 1/n \sum 1 ((xi-T) \leq PL). \dots\dots\dots (A.4)$$

where:  $T$ = per capita OOP

The OOP induced poverty headcount finally is estimated as: (*pre HP - post HP*)

Table 1. Average per episode total and medicine out of pocket payments by disease conditions in 2014

|                    | Outpatient 15 days recall |         |           |      |                   |      | Inpatient 365 days recall |         |           |       |                   |       |
|--------------------|---------------------------|---------|-----------|------|-------------------|------|---------------------------|---------|-----------|-------|-------------------|-------|
|                    | Prevalance                |         |           |      | estimated monthly |      | Prevalance                |         |           |       | estimated monthly |       |
| Ailment            | Freq.                     | Percent | Total OOP | Drug | Total OOP         | Drug | Freq.                     | Percent | Total OOP | Drug  | Total OOP         | Drug  |
| Fever              | 2,71,43,431               | 22.71   | 488       | 280  | 975               | 561  | 74,12,043                 | 12.95   | 8670      | 2329  | 713               | 191   |
| TB/Filaria/Tetanus | 11,08,425                 | 0.93    | 524       | 287  | 1047              | 573  | 6,14,933                  | 1.07    | 14731     | 4134  | 1,211             | 340   |
| STD/HIV/AIDS       | 1,20,714                  | 0.1     | 538       | 268  | 1076              | 536  | 88,935                    | 0.16    | 6906      | 1633  | 568               | 134   |
| Vectorborne        | 33,33,651                 | 2.79    | 549       | 332  | 1097              | 663  | 22,65,189                 | 3.96    | 10288     | 2460  | 846               | 202   |
| Cancers            | 4,52,513                  | 0.38    | 2527      | 1763 | 5054              | 3526 | 9,78,764                  | 1.71    | 62297     | 14037 | 5,121             | 1,154 |
| Blood disease      | 10,26,129                 | 0.86    | 1322      | 731  | 2643              | 1463 | 8,10,752                  | 1.42    | 15035     | 3650  | 1,236             | 300   |
| Diabetes           | 1,17,55,081               | 9.84    | 683       | 456  | 1367              | 911  | 8,17,199                  | 1.43    | 15746     | 4224  | 1,294             | 347   |
| Other Metabolic    | 20,50,282                 | 1.72    | 712       | 340  | 1423              | 679  | 2,60,707                  | 0.46    | 15429     | 3600  | 1,268             | 296   |
| Mental/Neuro       | 61,56,374                 | 5.15    | 690       | 451  | 1380              | 902  | 24,87,836                 | 4.35    | 26428     | 6685  | 2,172             | 549   |
| Eye/Ear            | 24,67,286                 | 2.06    | 950       | 454  | 1899              | 908  | 20,82,420                 | 3.64    | 11350     | 1407  | 933               | 116   |
| Cardio             | 1,55,65,223               | 13.02   | 645       | 449  | 1289              | 899  | 37,82,374                 | 6.61    | 34167     | 6129  | 2,808             | 504   |
| Respiratory        | 1,69,58,670               | 14.19   | 478       | 328  | 955               | 656  | 21,40,762                 | 3.74    | 14491     | 3325  | 1,191             | 273   |
| Gastro             | 77,13,330                 | 6.45    | 809       | 434  | 1617              | 869  | 45,40,520                 | 7.93    | 19587     | 4260  | 1,610             | 350   |

|                  |             |       |      |     |      |      |             |       |       |      |       |     |
|------------------|-------------|-------|------|-----|------|------|-------------|-------|-------|------|-------|-----|
| Skin             | 28,34,892   | 2.37  | 522  | 370 | 1043 | 740  | 3,80,346    | 0.66  | 12123 | 3514 | 996   | 289 |
| Musculo-Skeletal | 1,32,29,065 | 11.07 | 622  | 391 | 1244 | 782  | 19,66,211   | 3.44  | 24379 | 4677 | 2,004 | 384 |
| Genito-Urinary   | 21,91,953   | 1.83  | 1183 | 747 | 2365 | 1494 | 28,01,133   | 4.89  | 27085 | 5094 | 2,226 | 419 |
| Obstetric        | 3,64,060    | 0.3   | 1448 | 765 | 2896 | 1529 | 22,64,628   | 3.96  | 13050 | 2189 | 1,073 | 180 |
| Injuries         | 19,93,646   | 1.67  | 1522 | 730 | 3045 | 1460 | 46,19,876   | 8.07  | 26242 | 6000 | 2,157 | 493 |
| Others           | 28,92,298   | 2.42  | 655  | 426 | 1310 | 853  | 12,97,049   | 2.27  | 30196 | 6666 | 2,482 | 548 |
| Childbirth       | 1,46,562    | 0.12  | 585  | 398 | 1169 | 797  | 1,56,17,000 | 27.29 | 8508  | 1729 | 699   | 142 |



# BMJ Open

## Quantifying the financial burden of households' out-of-pocket payments on medicines in India. A repeated cross-section analysis of National Sample Survey data 1994 to 2014

|                                 |                                                                                                                                                                                                               |
|---------------------------------|---------------------------------------------------------------------------------------------------------------------------------------------------------------------------------------------------------------|
| Journal:                        | <i>BMJ Open</i>                                                                                                                                                                                               |
| Manuscript ID                   | bmjopen-2017-018020.R1                                                                                                                                                                                        |
| Article Type:                   | Research                                                                                                                                                                                                      |
| Date Submitted by the Author:   | 21-Nov-2017                                                                                                                                                                                                   |
| Complete List of Authors:       | Selvaraj, Sakthivel; Public Health Foundation of India, Farooqui, Habib; Public Health Foundation of India, Karan, Anup; Indian Institute of Public Health, Delhi (IIPHD), Public Health Foundation of India, |
| <b>Primary Subject Heading</b>: | Health economics                                                                                                                                                                                              |
| Secondary Subject Heading:      | Health policy                                                                                                                                                                                                 |
| Keywords:                       | HEALTH ECONOMICS, Health policy < HEALTH SERVICES ADMINISTRATION & MANAGEMENT, PUBLIC HEALTH                                                                                                                  |
|                                 |                                                                                                                                                                                                               |

SCHOLARONE™  
Manuscripts

**Title page**

Title of the article:

Quantifying the financial burden of households' out-of-pocket payments on medicines in India. A repeated cross-section analysis of National Sample Survey data 1994 to 2014

Full name, postal address, e-mail and telephone number of the corresponding author:

Dr. Habib Hasan Farooqui, MD

Associate Professor

Address: Public Health Foundation of India, Plot No. 47, Sector 44, Institutional Area, Gurugram, India -122001

Email: drhabibhasan@gmail.com

Phone: +91 9999984673

Full name, department, institution, city and country of all co-authors:

Dr. Sakthivel Selvaraj, PhD

Director,

Address: Public Health Foundation of India, Plot No. 47, Sector 44, Institutional Area, Gurugram, India -122001

Dr. Habib Hasan Farooqui, MD

Associate Professor

Address: Public Health Foundation of India, Plot No. 47, Sector 44, Institutional Area, Gurugram, India -122001

Dr. Anup Karan, DPhil

Associate Professor,

Address: Public Health Foundation of India, Plot No. 47, Sector 44, Institutional Area, Gurugram, India -122001

## Quantifying the financial burden of households' out-of-pocket payments on medicines in India. A repeated cross-section analysis of National Sample Survey data 1994 to 2014

**Objective:** The objective of this research is to generate new evidence on financial implications of medicines out of pocket (OOP) payments for households. Another objective is to investigate which disease conditions contributed to a significant proportion of households' financial burden.

**Setting:** All Indian States including Union Territories, 1993-94 to 2014

**Design:** Repeated cross section household surveys

**Data:** Secondary data of nationwide Consumer Expenditure Surveys for the years 1993-94, 2004-05 and 2011-12 and one wave of Social Consumption: Health for the year 2014 from National Sample Survey Organisation.

**Outcome measure :** Out-of-pocket expenditure on healthcare in general and medicines in specific.

**Results:** Total OOP payments and medicines OOP payments were estimated to be 6.77% [CI: 6.70%, 6.84%] and 4.49% [4.45%, 4.54%] of total consumption expenditure respectively in the year 2011-12 which marked significant increase since 1993-94. These proportions were 11.46% [CI: 11.36%, 11.56%] and 7.60% [CI: 7.54%, 7.67%] of non-food expenditure respectively in the same year. It was observed that total OOP payments and medicines OOP payments were catastrophic for 17.9% [CI: 17.7%, 18.2%] and 11.2% [11.0%, 11.4%] households respectively in 2011-12 at the 10% of total consumption expenditure threshold, implying 29 million households incurred catastrophic out-of-pocket payments in the year 2011-12. Further, medicines out-of-pocket payments pushed 3.09% [CI: 2.99%, 3.20%], implying 38 million, persons into poverty in the year 2011-12. Among the leading cause of diseases that caused significant OOP payments are cancers, injuries, cardiovascular diseases, genito-urinary conditions and mental disorders.

**Conclusions:** Strengthening government intervention in providing medicines free in public health care facilities has the potential to considerably reduce medicines related spending as well as total OOP payments of households.

Key words: India, out of payment, medicine, catastrophic expenditure, and poverty

**Article summary****Strengths and limitations of this study**

1. The study used multiple points of time and nationally representative data set to highlight the financial burden of households OOP payments on medicines in India;
2. The paper links medicines out-of-pocket payments by households with leading disease conditions and identify key disease conditions which cause medicines out-of-pocket payments
3. The study has limitations as it uses arbitrary threshold for measuring catastrophic payments
4. The ailments, disease conditions and the associated OOP expenditure reported by the households in the survey are self-reports and not clinically diagnosed.

## Background

Households' in India bear significant financial burden on account of medical treatment, as the current prepayment and risk pooling mechanisms are inadequate. Since both government funding and social health insurance contributions are insufficient to meet health care needs of households, over three-fourth of all health care payments are paid out-of-pocket (OOP) at the point of service delivery while medicines purchase (approximately 63%) account for the single largest component of these payments.<sup>1</sup> Available literature suggests that OOP spending has dominated total OOP payments over the years.<sup>2</sup> Hence, it can be suggested that expenditure on medicines is major cause of catastrophe at the household level.<sup>3</sup>

India has the distinction of being pharmacy of the global south - supplies affordable, life saving, quality generic medicines. It ranks 4th in terms of volumes and 13th in terms of value of pharmaceuticals produced globally.<sup>4</sup> However, according to a WHO report around 68% of the Indian population have limited or no access to essential medicines.<sup>5</sup> In addition, literature suggests that over last two decades availability of free medicines in public health facilities has declined from 31.2% to 8.9 % for inpatient care and from 17.8% to 5.9% for outpatient care.<sup>6</sup> Another study demonstrated that medicines purchase alone constituted over 70% of overall OOP payments. In addition, the study demonstrated that by removing OOP payments for outpatient care on medicines, the percentage of people falling below poverty because of spending on health reduced to just 0.5 % whereas removing OOP payments for inpatient care resulted in a negligible decline in poverty headcount ratio and poverty gap highlighting the role of medicines expenditure in healthcare related impoverishment.<sup>7</sup>

Utilising impoverishment tool to measure affordability, one study assessed the impoverishment effect of medicines purchases by households in 16 low-and-middle income economies.<sup>8</sup> Comparing four key medicine prices to household income, and using World Bank poverty levels of US\$ 1.25 or US\$ 2 per day, the study concluded that a substantial number of people had to bear financial burden due to unaffordability of medicines. For example, it was pointed out that an originator brand atenolol purchase by individuals would push an additional 22% of population below the US\$ 1.25 per day measurement while even a generic equivalent of atenolol was likely to push about 7% of population below poverty levels in Philippines.<sup>9</sup> Analyzing economic implications of non-communicable disease in India, a few studies also reported in the past that households incur significant OOP payment burden in certain conditions like cardiovascular diseases (CVD) and cancers.<sup>10 11</sup> Using 2004 NSSO data, another study highlighted that hospitalization with CVD resulted in 12% higher odds of incurring catastrophic spending and 37% greater odds of falling into poverty. For cancer, the impact was greatest with the odds of catastrophic expenditures 170% higher than the odds of incurring catastrophic spending when hospital stays are due to a

1  
2  
3 communicable disease condition.<sup>12</sup> However these studies do not reflect on the relative  
4 contribution of medicine in total OOP burden for the diseases they analysed.  
5  
6

7 Available evidence, both global and Indian, provides insights about the incidence of  
8 catastrophic payments and impoverishment impact of rising households OOP payments.<sup>2,3</sup>  
9<sup>13-15</sup> The literature on equity dimensions involving both catastrophe and impoverishment  
10 has attempted to address complex methodological and statistical approaches in  
11 measurements. However, there is lack of evidence on catastrophe and impoverishment on  
12 account of household's medicine OOP expenditure not only from inpatient and outpatient  
13 treatment costs perspective but also from the disease specific dimension. Given that  
14 medicines contribute to more than 66.6% of out-of-pocket healthcare expenditure, the  
15 focus of this research is to explore the consequences of high medicines OOP spending at the  
16 household level. Further, we investigated which disease conditions are contributing to high  
17 financial burden on households. We attempted to answer - what is the relative burden of  
18 medicines OOP payments by households in total OOP payments, catastrophic and poverty  
19 headcounts? And which disease conditions cause a relatively higher financial disruption in  
20 the living status of households?  
21  
22  
23  
24  
25  
26

## 27 **Materials and methods**

### 28 **Data**

29 The study utilises secondary data from three waves of nationally representative 'Consumer  
30 Expenditure Surveys' (CES): 1993-94, 2004-05 and 2011-12, conducted by the National  
31 Sample Survey Organisation (NSSO). In addition, health and morbidity survey (HMS) 2014 of  
32 the NSSO was used for disease-wise distribution of OOP payment burden. While the sample  
33 size of CES varied between 100,000 to 125,000 thousand households across different  
34 rounds, the sample size in HMS 2014 was approximately 72,000 households.  
35  
36  
37

38 The CES collect socioeconomic and demographic information on households with key focus  
39 is on household spending on roughly 350 food and non-food items. Out-of-pocket medical  
40 expenses incurred by households are separately recorded for inpatient and outpatient  
41 services. The recall periods are one-year and 30-days for inpatient and outpatient expenses  
42 respectively. HMS collects detailed information on morbidity pattern, utilisation of health  
43 care services and associated expenditure by households. The HMS too separately records  
44 expenditure for inpatient and outpatient. However, unlike in CES the recall period for  
45 outpatient in HMS is 15 days.  
46  
47  
48  
49

50 Both CES and HMS are repeated cross-section surveys that are representative at the  
51 national and state levels. All districts of a state are included for sampling purposes.  
52 Households in CES are sampled evenly in quarterly sub-rounds beginning on 1 July and  
53 ending on 30 June of the following year, with equal numbers of households allotted in each  
54 quarterly sub-round, to address seasonality. In HMS, survey was completed in two sub-  
55  
56  
57  
58  
59  
60

1  
2  
3 rounds during January 1 to June 30, 2014. All estimates in the present paper are sample  
4 weighted.  
5

#### 6 Outcome indicators

7  
8 Using CES, we estimated 4 household-level indicators involving financial burden of illness: i)  
9 per household member monthly OOP spending on medicines (inflation-adjusted), ii) OOP  
10 spending on medicines as a share of total household and non-food spending, and iii)  
11 percentage of households reporting catastrophic payments on medicines and iv) percentage  
12 of households slipping onto poverty after netting out medicines OOP payments from  
13 households' total consumption expenditure. Total OOP spending of households was  
14 estimated by adding together expenditure on components of OOP payments. For inpatient  
15 OOP payment, we considered institutional spending on medicines, X-ray, ECG, pathological  
16 tests etc., doctor's/surgeon's fee, hospital and nursing charges and other medical expenses.  
17 For outpatient OOP payment, the components of expenditure are medicines, X-ray, ECG,  
18 pathological tests etc., doctor's/surgeon's fee, family planning services and other medical  
19 expenses. Expenditure on medicines is directly reported in the data set, both for inpatient  
20 and outpatient services (see Table A-I in Annexure). All the analyses report mean OOP  
21 spending on two parallel tracks: aggregated (across components of OOP) OOP payments  
22 (henceforth referred to as 'total OOP') and OOP payments only on account of medicine  
23 purchase (henceforth referred to as medicine/drug OOP).  
24  
25  
26  
27  
28  
29

30  
31 Catastrophic payment for health care is defined as OOP payments being higher to a pre-  
32 defined threshold of total household consumption expenditure or alternatively household's  
33 non-food expenditure. For measuring catastrophic expenditure,<sup>2,9</sup> instead of sticking to a  
34 particular threshold, we considered a range of thresholds.<sup>2,16-18</sup> We also considered  
35 alternative thresholds as OOP spending as a share of household non-food expenditure. For  
36 OOP payment induced poverty estimates, we used two different poverty lines: i) Indian  
37 official state-specific rural and urban poverty lines<sup>19</sup> and ii) international poverty line based  
38 on US \$ 1 per day per person adjusted to US \$ 1.9 purchasing power parity (PPP) per day per  
39 person for the year 2011-12<sup>20</sup>. Yet another important poverty indicator, which particularly  
40 estimates magnitude of poverty deepening, is poverty gap. Using both the poverty lines  
41 separately, we also estimated mean poverty gaps for the poor. Details of the method used  
42 for catastrophic and poverty estimates are presented in Annexure.  
43  
44  
45  
46

47  
48 In addition, we used NSSO 2014 HMS data for estimating disease level total and medicine  
49 OOP spending separately for inpatient and outpatient. Unlike CES, OOP spending in NSSO  
50 2014 has not been recorded as part of the total household consumption expenditure and  
51 instead of estimating disease-wise catastrophic headcount, we present distribution of  
52 disease conditions based on incidence of occurrence and range of OOP spending separately  
53 for outpatient (15 days recall converted for 30 days) and inpatient (365 days recall  
54  
55  
56  
57  
58  
59

converted for 30 days). This helped identifying disease conditions, separately for outpatient and inpatient, which are high frequency occurrence and greater incidence of OOP spending.

## Results

First, we present basic financial burden indicators for the years 1993-94, 2004-05 and 2011-12 in Table 1. Over 80% of populations are reportedly spending out-of-pocket while seeking treatment, during 2011-12. The proportion of population reporting any OOP payments have increased sharply from about 60% during 1993-94 to 80% percent in 2011-12. In respect to medicines spending, approximately every OOP spending is associated with expenditure on medicines. There was a significant increase (more than 50%) in household's total consumption expenditure in real terms from INR 517 in 1993-84 to INR 794 in 2011-12. However, during the same period total OOP payments increased by more than 100% from INR 26 in 1993-94 to INR 54 in 2011-12 in real terms. The rise in OOP payments on medicines has been more than 70% during the same period. Consequently, the share of spending on health from households' overall consumption expenditure have registered sharp increase during the past two decades, from a moderate 4.8% during 1993-94 to nearly 7% in 2011-12. If we were to net out food expenditure from total household consumption spending, which are considered a necessity, the share of health spending remained stagnant but as high as 11-12% percent during the period under consideration. It may be observed that in 2011-12 medicines alone contributed up to 67% of the total OOP payments.

Table 1: Financial burden indicators, India, 1993-94, 2004-05 and 2011-12

| Financial burden indicators                                                 | 1993-94              | 2004-05           | 2011-12           |
|-----------------------------------------------------------------------------|----------------------|-------------------|-------------------|
| <b>Percentage households reporting OOP payments</b>                         |                      |                   |                   |
| Total OOP payments (%)                                                      | 59.2 [58.9, 59.5]    | 64.4 [64.2, 64.7] | 80.5 [80.2, 80.7] |
| Medicines OOP payments (%)                                                  | 57.5 [57.3, 57.8]    | 63.6 [63.3, 63.8] | 79.0 [78.8, 79.3] |
| <b>Monthly per capita expenditure (INR at constant 1999-2000 prices*)</b>   |                      |                   |                   |
| Total household consumption expenditure                                     | 517 [515, 519]       | 619 [616, 622]    | 794 [790, 799]    |
| Total out-of-pocket expenditure on health                                   | 25.59 [24.61, 26.25] | 36.3 [35.7, 37.0] | 54.3 [53.3, 55.3] |
| Medicine out-of-pocket expenditure                                          | 20.86 [19.50, 21.25] | 26.0 [25.6, 26.4] | 36.1 [35.5, 36.8] |
| <b>Share of health to total household expenditure (%)</b>                   |                      |                   |                   |
| Share of total out-of-pocket expenditure to total household expenditure (%) | 4.84 [4.78, 4.91]    | 5.78 [5.72, 5.83] | 6.77 [6.70, 6.84] |



|                                                                                |                      |                      |                      |
|--------------------------------------------------------------------------------|----------------------|----------------------|----------------------|
| Share of medicine out-of-pocket expenditure to total household expenditure (%) | 3.93 [3.87, 3.98]    | 4.10 [4.06, 4.14]    | 4.49 [4.45, 4.54]    |
| <b>Share of health to non-food household expenditure (%)</b>                   |                      |                      |                      |
| Share of total OOP payments to non-food expenditure (%)                        | 12.37 [12.20, 12.55] | 10.82 [10.72, 10.91] | 11.46 [11.36, 11.56] |
| Share of medicines OOP payments to non-food expenditure (%)                    | 10.02 [9.88, 10.17]  | 7.68 [7.62, 7.75]    | 7.60 [7.54, 7.67]    |

Notes: 1. numbers in brackets are 95% confidence interval; 2. State and rural-urban specific consumer price indices were used to convert current prices values at the constant 1999-2000 prices. 3. The current prices values for monthly per capita total OOP are 15.7, 41.8 and 111.2 and for medicine OOP are 12.8, 29.8 and 73.9 (all in INR) for the years 1993-94, 2004-05 and 2011-12 respectively.

A higher burden of households' OOP payment is often associated with impoverishment and catastrophe. In Table 2, we present a set of catastrophic cut-offs measured as a share of OOP payments to total household consumption expenditure and non-food expenditure. Estimates for both OOP payments as well as OOP payments underlying medicines expenditure by households are presented.

**Table 2: Percentage of households incurring catastrophic payments with respect to total OOP spending and medicines OOP spending, 1993-94, 2004-05 and 2011-12**

| Financial Health Equity Measurements                             | 1993-94 (%)       | 2004-05 (%)       | 2011-12 (%)       | Estimated number of households (2011-12) |
|------------------------------------------------------------------|-------------------|-------------------|-------------------|------------------------------------------|
| <b>Cut-off for catastrophe using total household expenditure</b> |                   |                   |                   |                                          |
| Total OOP payment > 5%                                           | 26.9 [26.6, 27.1] | 28.7 [28.5, 30.0] | 35.3 [35.0, 35.6] | 9,01,07,225                              |
| Total OOP payment > 10%                                          | 13.9 [13.8, 14.2] | 14.6 [14.4, 14.8] | 17.9 [17.7, 18.2] | 4,56,91,766                              |
| Total OOP payment > 25%                                          | 3.9 [3.8, 4.0]    | 3.5 [3.4, 3.6]    | 4.3 [4.2, 4.4]    | 1,09,76,234                              |
| Medicines OOP payment > 5%                                       | 23.3 [23.0, 23.5] | 23.4 [23.2, 23.6] | 27.0 [26.7, 27.2] | 6,89,20,540                              |
| Medicines OOP payment > 10%                                      | 11.5 [11.3, 11.7] | 10.2 [10.2, 10.4] | 11.2 [11.0, 11.4] | 2,85,89,261                              |

|                                                           |                         |                         |                         |              |
|-----------------------------------------------------------|-------------------------|-------------------------|-------------------------|--------------|
| Medicines OOP payment > 25%                               | 02.9<br>[2.8,<br>2.9]   | 1.6 [1.5,<br>1.7]       | 1.8 [1.7,<br>1.9]       | 45,94,703    |
| <b>Cut-off for catastrophe using non-food expenditure</b> |                         |                         |                         |              |
| Total OOP payment > 5%                                    | 47.8<br>[47.5,<br>48.1] | 46.5<br>46.2,<br>46.8]  | 53.5<br>[53.2,<br>53.8] | 13,65,64,775 |
| Total OOP payment > 10%                                   | 34.8<br>[34.6,<br>35.1] | 31.0<br>[30.7,<br>31.2] | 34.9<br>[34.7,<br>35.2] | 8,90,86,180  |
| Total OOP payment > 25%                                   | 16.7<br>[16.5,<br>16.9] | 11.4<br>[11.2,<br>11.5] | 11.9<br>[11.7,<br>12.1] | 3,03,76,090  |
| Total OOP payment > 40%                                   | 9.7 [9.5,<br>9.9]       | 4.7 [4.6,<br>4.9]       | 4.9 [4.8,<br>5.0]       | 1,25,07,802  |
| Medicines OOP payment > 5%                                | 44.7<br>[44.4,<br>45.0] | 42.5<br>[42.2,<br>42.8] | 46.4<br>[46.1,<br>46.7] | 11,84,41,225 |
| Medicines OOP payment > 10%                               | 31.2<br>[31.0,<br>31.5] | 25.5<br>[25.3,<br>25.7] | 26.1<br>25.9,<br>26.4]  | 6,66,23,189  |
| Medicines OOP payment > 25%                               | 13.9<br>[13.7,<br>14.1] | 7.1 [7.0,<br>7.3]       | 6.3 [6.1,<br>6.4]       | 1,60,81,459  |
| Medicines OOP payment > 40%                               | 7.8 [7.6,<br>7.9]       | 2.2 [2.1,<br>2.3]       | 1.8 [1.7,<br>1.9]       | 45,94,703    |

Note: Figures in brackets are 95% confidence interval.

Over one-third of Indian households incurred OOP payments greater to 5% of total household expenditure in 2011-12. This percentage was lower in 1993-94 (27%) and 2004-05 (28%). At the 25% threshold of total household expenditure, over 4% households reported incurring OOP payments in 2011-12. This essentially translates to approximately 11 million Indian households. Out of these, more than 4.4 million households incurred such payments only on account of purchase of medicines. At a lower threshold of 10% of total household expenditure, the number of households facing catastrophe is approximately 46 millions, of which 29 million households incurred catastrophe on account of OOP payments on medicines alone. Considering only non-food expenditure of households as the basic living status variable, approximately similar number of households incurred medicines OOP payments in 2011-12 with OOP payments being as high as 40% of their non-food expenditure.

**Table 3: Impoverishment Indicators due to households' total OOP and medicine spending ,  
India, 1993-94, 2004-05 and 2011-12**

|                                                       | 1993-94              | 2004-05              | 2011-12              | Estimated population (2011-12) |
|-------------------------------------------------------|----------------------|----------------------|----------------------|--------------------------------|
| <b>I. Using national poverty line*</b>                |                      |                      |                      |                                |
| <i>1. Headcount ratio indicators (%)</i>              |                      |                      |                      |                                |
| Gross Headcount                                       | 45.32 [45.03, 45.61] | 37.85 [37.58, 38.12] | 22.17 [21.92, 22.43] | 27,19,03,356                   |
| Headcount net of total OOP                            | 49.52 [49.22, 49.81] | 42.68 [42.40, 42.95] | 26.65 [26.38, 26.92] | 32,68,48,193                   |
| Total OOP payment induced poverty                     | 4.20 [4.07, 4.30]    | 4.83 [4.71, 4.94]    | 4.48 [4.35, 4.60]    | 5,49,44,837                    |
| Headcount net of medicine OOP payment                 | 48.91 [48.61, 49.20] | 41.54 [41.27, 41.82] | 25.27 [25.00, 25.53] | 30,99,23,221                   |
| Medicine OOP payment induced poverty                  | 3.59 [3.47, 3.69]    | 3.69 [3.59, 3.80]    | 3.09 [2.99, 3.20]    | 3,78,97,220                    |
| <i>2. Poverty gap indicators (INR current prices)</i> |                      |                      |                      |                                |
| Gross poverty gap#                                    | 63.3 [62.9, 63.8]    | 103.4 [102.7, 104.2] | 154.2 [152.3, 156.0] |                                |
| Gap net of total OOP payment ##                       | 69.7 [69.3, 70.1]    | 115.8 [115.1, 116.5] | 182.8 [181.0, 184.7] |                                |
| Total OOP payment induced gap###                      | 6.4 [6.3, 6.5]       | 12.4 [12.2, 12.6]    | 28.6 [28.0, 29.2]    |                                |
| Gap net of medicine OOP payment ###                   | 68.9 [68.5, 69.3]    | 113.7 [113.0, 114.4] | 176.7 [174.9, 178.5] |                                |
| Medicine OOP payment induced gap####                  | 5.6 [5.5, 5.7]       | 10.3 [10.1, 10.4]    | 22.5 [22.0, 23.0]    |                                |

| <b>II. Using international poverty line**</b>         |                      |                      |                      |              |
|-------------------------------------------------------|----------------------|----------------------|----------------------|--------------|
| <i>1. Headcount ratio indicators (%)</i>              |                      |                      |                      |              |
| Gross Headcount                                       | 40.96 [40.67, 41.24] | 33.07 [32.81, 33.34] | 18.37 [18.13, 18.61] | 22,52,98,360 |
| Headcount net of total OOP payment                    | 44.92 [44.63, 45.21] | 37.38 [37.11, 37.65] | 22.41 [22.16, 22.67] | 27,48,46,829 |
| Total OOP payment induced poverty                     | 3.97 [3.85, 4.08]    | 4.31 [4.19, 4.42]    | 4.04 [3.92, 4.16]    | 4,95,48,469  |
| Headcount net of medicine OOP payment                 | 44.35 [44.06, 44.64] | 36.34 [36.08, 36.61] | 21.37 [21.11, 21.62] | 26,20,91,778 |
| Medicine OOP payment induced poverty                  | 3.39 [3.29, 3.50]    | 3.27 [3.17, 3.68]    | 2.99 [2.89, 3.10]    | 3,66,70,773  |
| <i>2. Poverty gap indicators (INR current prices)</i> |                      |                      |                      |              |
| Gross poverty gap#                                    | 59.3 [58.9, 59.7]    | 96.1 [95.3, 96.8]    | 150.7 [148.8, 152.7] |              |
| Gap net of total OOP payment ##                       | 65.4 [64.9, 65.8]    | 107.5 [106.8, 108.3] | 177.0 [175.1, 179.1] |              |
| Total OOP payment induced gap###                      | 6.1 [6.0, 6.2]       | 11.5 [11.2, 11.7]    | 26.3 [25.7, 27.0]    |              |
| Gap net of medicine OOP payment ###                   | 64.6 [64.2, 65.1]    | 105.8 [105.0, 106.5] | 172.0 [170.0, 174.0] |              |
| Medicine OOP payment induced gap###                   | 5.3 [5.2, 5.4]       | 9.7 [9.5, 9.9]       | 21.3 [20.7, 21.8]    |              |

Notes: based on Tendulkar Committee methods; \*\* using USD 1.90 PPP at 2011-12 prices and mixed recall period of household consumption expenditure; # only for poor; ## only for poor net of total OOP; ### only for poor net of medicine OOP

Next, we present implications of total and medicine OOP payments on poverty estimates (Table 3). To facilitate interpretation, we present 3 basic headcount ratio indicators: i) gross headcount – percentage of population below poverty line, ii) net of OOP headcount – percentage of population below poverty line after netting out OOP payments from

1  
2  
3 household consumption expenditure and iii) OOP payments induced poverty which is the  
4 difference of the first two reflecting rise in poverty ratio owing to OOP payments. The last  
5 two indicators are presented separately for total OOP payments and medicine OOP  
6 payments. Table 3 also provides estimates on poverty gap representing extent of poverty  
7 deepening in terms of monetary value. All these indicators are estimated using Indian  
8 official poverty line (Tendulkar Committee method) and international poverty line of US \$  
9 1.90 PPP.  
10  
11

12  
13 The difference in mean headcount measure of gross and net poverty ratios reflects the  
14 percentage of population falling below poverty line because of households' OOP payments  
15 on health care. The headcount ratio of households impoverished due to OOP payments was  
16 3.97% during 1993-94, which inched up to 4.30% in 2004-05 while in 2011-12 it was at  
17 4.04%, as per international poverty line. In terms of Indian state-specific official poverty  
18 lines, percentage of households falling below poverty line increased from 4.19% in 1993-94  
19 to 4.48% in 2011-12. This translates to 55 million persons in 2011-12. Out of this,  
20 approximately 38 million became poor only because they had to purchase medicines  
21 through OOP payments. Using the same measurement, the headcount measure for  
22 households OOP payments on medicines appear to have marginally declined from 3.58% in  
23 1993-94 to 3.09% during 2011-12 using the international poverty line. As far as poverty gap  
24 is concerned, based on the Indian official poverty line, total OOP payments and OOP  
25 payments on medicines resulted in poverty deepening among poor by INR 29 and INR 23  
26 respectively in 2011-12. Further poverty deepening because of total and medicines OOP  
27 payments sharply increased in 2012 compared to that in the years 2004-05 and 1993-94.  
28  
29  
30  
31  
32  
33

#### 34 OOP expenditure by disease conditions

35 We also conducted a disaggregated analysis on disease wise expenditure not only with  
36 reference to total OOP payments and medicines OOP payments but also by type of care -  
37 inpatient care versus outpatient care. The survey results suggested that most common  
38 health condition for seeking outpatient care was fever (22.7%) and for inpatient care was  
39 childbirth (27.3%). In addition, our estimates suggest that households incurred highest  
40 monthly per capita OOP spending both for inpatient and outpatient care on account of  
41 cancer treatment (INR 5,054 and INR 5,121 respectively) followed by injuries for outpatient  
42 care (INR 3,045) and cardiovascular events for inpatient care (INR 2,808).  
43  
44  
45  
46  
47

48 We also mapped disease-wise expenditure, frequency of healthcare utilization and type of  
49 care to demonstrate that not only hospitalization but also outpatient care can lead to  
50 catastrophe and impoverishment of households (Figure 1). For example, our estimates  
51 suggest that monthly per capita medicines OOP payments for cancer care were significantly  
52 higher in outpatient care as compared to the inpatient care. However, as far as total OOP  
53 spending for cancer treatment is concerned, it is almost similar across inpatient and  
54 outpatient but significantly higher compared to that for other disease conditions. In  
55  
56  
57  
58  
59  
60

1  
2  
3 contrast, in respect to cardiovascular conditions, medicines OOP payments were similar for  
4 both inpatient and outpatient treatment but total OOP payments were significantly higher  
5 for inpatient treatment as against outpatient treatment. In treatments involving  
6 gastroenterology conditions, however, both medicines OOP payments and total OOP  
7 payments were higher for outpatient compared to inpatient treatment. Similarly, for mental  
8 disorders, medicines OOP payments were higher for outpatient care compared to inpatient  
9 but total OOP payments were almost similar both for outpatient and inpatient treatment.  
10 Therefore, it is noted that the average monthly medicines OOP payments were consistently  
11 higher for outpatient care as compared to inpatient care among key disease conditions. A  
12 relatively higher frequency of outpatient treatment visits compared to inpatient treatment  
13 coupled with a significantly larger medicines OOP payment may yield a higher incidence of  
14 catastrophe. A detailed estimate of prevalence and OOP payments by disease conditions  
15 cross-classified by inpatient and outpatient care are presented in Table A-II in Annexure.  
16  
17  
18  
19  
20

21 Further, we plotted outpatient and inpatient OOP payments and medicines related OOP  
22 payments with respect to households 'usual' consumption expenditure. In Figure 2,  
23 households are ranked from the poorest to the richest on the X-axis based on their mean  
24 monthly per person consumption expenditure and on the Y-axis mean monthly per person  
25 OOP expenditure (total and medicine) are measured separately for outpatient and  
26 inpatient. It is observed that for a number of households, average monthly outpatient  
27 expenditure is not only significantly higher in relation to household's non-medical  
28 consumption expenditure but the frequency of such events is also higher in outpatient care  
29 as compared to inpatient care. In Figure 2, the concentration of red (total OOP payment)  
30 and green (medicine OOP payment) spikes above the consumption expenditure on the right  
31 hand side of the graph which reflects that even among richer households total OOP and  
32 medicine OOP payments are significantly higher than total non-medical consumption  
33 expenditure of households. Moreover, concentration of medicine OOP payments above  
34 households' non-medical consumption expenditure is more prominent in case of outpatient  
35 compare to the inpatient episodes.  
36  
37  
38  
39  
40  
41  
42

### 43 **Discussion and conclusion**

44  
45 Using standard methods of measuring catastrophe and impoverishment,<sup>17 18</sup> this paper  
46 demonstrates the financial burden of households' OOP payments on medicines in India,  
47 spanning two decades from 1993-94 to 2011-12. To our knowledge, this is a first attempt to  
48 link medicines' OOP spending to key diseases conditions. Two trends stand out clearly from  
49 our findings. First, the households' impoverishment on account of OOP expenditure is  
50 rather high and continued to be so during the last two decades. The impoverishment  
51 burden is largely driven by households spending on medicines, which accounted for over  
52 three-fourth of all medical impoverishment in India. Second, as far the catastrophe  
53 measurement is concerned, applying a 10% threshold of OOP payment on overall  
54  
55  
56  
57  
58  
59  
60

1  
2  
3 consumption expenditure, an estimated 18% percent of Indian households appear to suffer  
4 financial catastrophe. Medicines' OOP expenditure alone contributed to an estimated 11%  
5 of financial catastrophe. In absolute numbers, this translates to a scenario where an  
6 estimated 46 million households appear to face catastrophic expenditure on account of  
7 OOP payments while 29 million households faced such hardship because they had to pay for  
8 medicines from their pockets.  
9  
10

11  
12 Recent evidence from the National Health Accounts for India points out that during 2013-  
13 14, an estimated INR 1,331 per capita was spent on medicines, while households alone  
14 contributed INR 1,200 per capita, accounting for 90% of all medicines expenditure in the  
15 country.<sup>1</sup> On the other hand, past evidence about government expenditure on medicines in  
16 India, underscores that, on an average government spent about 10% percent of health  
17 expenditure on medicines. However, the national average masks significant underspending  
18 on medicines by several state governments, with many reportedly spending less than five  
19 percent of their health budgets.<sup>6</sup> Besides poor allocation of resources, except for a couple of  
20 Indian states, drug procurement and supply chain system is inefficient and ineffective  
21 leading to acute shortages of key essential medicines and chronic stock-outs in public health  
22 facilities.<sup>21-24</sup> This situation has resulted in physical unavailability of medicines. Drawing  
23 evidence from large sample surveys for the period from 1986-87 to 2004, it is reported the  
24 physical barrier to access to key essential medicines worsened during this period.<sup>15</sup> Supply  
25 of free drugs in government health system in the outpatient care setting, declined sharply  
26 from about 18% in 1986-87 to 5% in 2004. For the same period, drugs prescribed during  
27 hospitalization for free also declined significantly from one-third to about 9%.<sup>6</sup> As a result, it  
28 is pointed out the number of hospitalization episodes in which an ailing population paid out-  
29 of-pocket (OOP) payment, has risen dramatically from about 41% to close to 72%.<sup>6</sup> Further,  
30 it was observed that from the period spanning mid-1990s to 2004, patients visiting  
31 government health facilities did not receive medicines in over one-fourth of outpatient  
32 episodes. Affordability of medicines is an important access indicator, because it translates  
33 into poor access or no access for people who have low purchasing power.<sup>3</sup> The consumer  
34 behaviour theory also predicts that raising the price (via high OOP expenditure on medicines  
35 or high copayment) for a service in the public health sector will move more consumers into  
36 the private sector, depending on the elasticity of substitution and transaction costs in the  
37 public sector.<sup>25</sup>  
38  
39  
40  
41  
42  
43  
44  
45  
46

47  
48 In view of inadequate availability of medicines in government health facilities, households  
49 end up accessing private facilities where they end up incurring significant OOP payment, in  
50 the absence of any financial risk protection. Past evidence suggests that the trend has  
51 sharpened in the last couple of decades. For instance, the percentage of population  
52 accessing private facilities for inpatient and outpatient treatment has accelerated  
53 significantly between 1986-87 and 2004. It may be observed that households accessing  
54 private hospital for inpatient care increased from around 40% to nearly 60% in rural India  
55  
56  
57  
58  
59  
60

1  
2  
3 while urban India reported a rise from 40% to 68%.<sup>26</sup> During the same period, outpatient  
4 care visits in private facilities remained high at around 75% in 1986-87 in rural India and 73%  
5 in urban India stepped up to 78% and 80% respectively for rural and urban India.<sup>3</sup>  
6  
7

8 The other critical evidence emerging from this paper focuses on disease specific medicines  
9 expenditure. The results demonstrate a pattern where households' medicine spending is  
10 concentrated on low frequency, high-value spending and high frequency, high-value  
11 spending. By disease-wise classification, expenditure on treatment of cancers, CVDs and  
12 injuries, both for outpatient and inpatient care dominate the spending pattern. Available  
13 literature confirms such an expenditure pattern, wherein the share of non-communicable  
14 diseases (cardiovascular disease, diabetes, cancer, mental illness, injuries and others) in  
15 OOP health expenses has increased from 31.6% in 1995-96 to 47.3% in 2004.<sup>12</sup> The  
16 literature further indicates high odds of catastrophic hospitalization expenditures for certain  
17 NCDs. For example, the odds for catastrophic expenditure in cancer are nearly 170%  
18 greater, for cardiovascular diseases (CVD) and injuries nearly 22% greater than the odds due  
19 to infectious diseases. Other studies on cardiovascular diseases highlighted that CVD  
20 affected households had more outpatient visits and inpatient stays, spent extra money per  
21 hospitalization<sup>11</sup> and have high probability of incurring catastrophic expenditure.<sup>27</sup> Another  
22 Indian study on socio-economic inequalities in financing of diabetes and cardiovascular  
23 disease reported that out-of-pocket payments for hospital treatment claimed a large share  
24 of annual household expenditures; 30% for CVD and 17% for diabetes.<sup>28</sup> In respect to  
25 injuries (both road traffic and non-road traffic), high incidence of catastrophic expenditure  
26 was 30%, and was significantly higher among those belonging to the lowest income quartile  
27 and with an inpatient stay greater than 7 days.<sup>29</sup>  
28  
29  
30  
31  
32  
33  
34  
35

36 Although public facilities have slightly stepped up their share in outpatient care in recent  
37 years, private sector continue to dominate both in outpatient and inpatient care in India.<sup>30</sup>  
38 As an increasing share of households' access private health facilities, private retail  
39 pharmacies have become a major source of supply of key essential medicines. While  
40 availability of medicines may per se is not a challenge in the private health care setting,  
41 affordability appears to act as critical barrier.<sup>31</sup> Thus, pricing of medicines and regulation  
42 around retail medicine prices becomes a key factor in improving affordability and thereby  
43 leading to a reduction in medicines related OOP payment burden. Although India had a  
44 progressive retail price cap policies since 1979, but over the years a policy of deregulation  
45 was followed.<sup>32</sup> In 2013, the Government of India promulgated the Drugs Price Control  
46 Order (DPCO), 2013 (DPCO, 2013) which primarily brought all essential drugs, based on  
47 National List of Essential Medicines, 2011, under price control.<sup>33</sup> An evaluation of new price  
48 regulation has highlighted that, while few of the medicines (37) had an increase in sales  
49 volume attributable to DPCO, majority of the medicines (52) had a negative impact on their  
50 sales volume due to DPCO. Overall, the DPCO may have had a negative impact in terms of  
51 sales volume of medicines under price control.<sup>34</sup> Given that the sales volume of price-  
52  
53  
54  
55  
56  
57  
58  
59  
60



1  
2  
3 capped medicines has declined, households OOP spending may continue to increase since  
4 over 80% of retail pharmacy market is not price-capped.  
5

6  
7 In order to improve access to health care and to provide financial risk protection to  
8 households, the central government and several state governments have been  
9 implementing a publicly funded health insurance programs since 2007, whose primary aim  
10 was to provide cashless treatment to economically vulnerable households for  
11 hospitalization episodes. Emerging evidence from micro as well as macro level studies point  
12 to a trend where such insurance schemes appear to have improved access to hospital care  
13 but have been ineffective in preventing financial catastrophe and impoverishment to  
14 households.<sup>2 35 36</sup> These bodies of evidence are in line with our findings that hospitalization  
15 based treatment cost constitute only one-third of India's morbidity burden. Despite  
16 implementation of several health insurance schemes, a majority of Indian population  
17 continues to incur a relatively significant medicines OOP payment while seeking outpatient  
18 care. It would be pertinent to highlight that the frequency of hospitalization is considerably  
19 smaller than outpatient visits in general, especially for non-communicable diseases (NCDs),  
20 which are chronic in nature that require multiple consultations and long-term or life-long  
21 medication support. Such medical conditions result in catastrophic expenditure for  
22 households even in the absence of hospitalization episodes. Moreover, since a relatively  
23 larger proportion of population seeks outpatient care in private facilities, which is often  
24 multiple times expensive than public health facilities, we observe a disproportionately  
25 higher burden of medicines related OOP payment for outpatient care.  
26  
27  
28  
29  
30  
31  
32

33 The evidence presented in this paper, however, suffers from a few limitations. The first set  
34 of challenge relates to co-morbidities and associated expenditure. In respect to inpatient  
35 cases, since NSSO data captures disease expenditure separately for various disease  
36 conditions, the issue of co-morbid conditions did not play major role. However, for  
37 outpatient cases, we had to adopt apportioning technique to handle co-morbid conditions.  
38 The second set of challenge pertains to the potential recall bias for disease specific  
39 expenditures, which cannot be ruled out especially for hospitalization treatment since the  
40 recall period is a longer time span of 365 days.  
41  
42  
43  
44

45 The foregoing underlines several policy interventions and program design that were  
46 conceived and implemented in the recent past to provide financial risk protection to  
47 households. However, gross underinvestment in the public health system in past had led to  
48 inadequate prepayment and risk pooling measures.<sup>26</sup> Several policy interventions and  
49 program redesign are required to reverse the trend of high OOP expenditure for healthcare  
50 in India. An efficient and a reliable medicines supply chain model existed for over two and  
51 half decades in the state of Tamil Nadu, which was replicated in the state of Rajasthan in  
52 2012 have been instrumental in improving access to medicines in the frontline facilities in  
53 these two states.<sup>37</sup> Such policies and programs governing public health facilities are critical.  
54  
55  
56  
57  
58  
59  
60

1  
2  
3 The National Health Policy 2017 also highlighted the need for providing free medicines in  
4 public health facilities by stepping up funding and improving drug procurement and supply  
5 chain mechanisms.<sup>38</sup> A recent pronouncement by the government intends to bring  
6 legislation for physicians to prescribe drugs only in generic names, holds even greater  
7 promise for reducing households' OOP payments on medicines and ultimately providing  
8 financial risk protection. To sum up, both national and state governments' intervention is  
9 required for providing free medicines in public health facilities along with expanding the  
10 mechanism of price capping of key essential medicines in the private market.  
11  
12  
13

14 Contributorship: AK and SS conceived the idea, designed the analysis, conducted data  
15 analysis and wrote the first draft of the paper. AK, SS and HHF conducted the literature  
16 review and the interpretation of the results. AS, SS and HHF revised and edited the  
17 manuscript to its final stages. All the authors approved the final manuscript version.  
18  
19  
20

21 Acknowledgments: None  
22  
23

24 Competing Interests: We declare no conflict of interest.  
25  
26

27 Funding: Habib Hasan Farooqui is supported by a Wellcome Trust Capacity Strengthening  
28 Strategic Award to the Public Health Foundation of India and a consortium of UK  
29 universities. The funders had no role in study design, data collection and analysis, decision  
30 to publish, or preparation of the manuscript.  
31  
32

33 Data sharing: The data used for the analysis is available in public domain.  
34  
35

36 Ethical approval: Ethical approval for this study was not needed. The study used only  
37 anonymised data from secondary sources. Requisite permission to use the data has been  
38 obtained from the agency.  
39  
40

41 Reference list:  
42  
43

- 44 1. (NHSRC). NHSRC. National Health Accounts Estimates for India 2013-14: Ministry of  
45 Health and Family Welfare (MoHFW). Government of India, 2014.
- 46 2. Karan A, Selvaraj S, Mahal A. Moving to universal coverage? Trends in the burden of out-  
47 of-pocket payments for health care across social groups in India, 1999-2000 to 2011-  
48 12. *PLoS one* 2014;9(8):e105162. doi: 10.1371/journal.pone.0105162
- 49 3. Selvaraj S, Karan A. Deepening health insecurity in India: evidence from national sample  
50 surveys since 1980s. . *Econ Polit Wkly* 2009;44:55–60.
- 51 4. WHO. The World Medicines Situation 2011. Geneva: World Health Organization, 2011.
- 52 5. WHO. The World Medicine Situation 2004. Geneva: World Health Organization, 2004.
- 53 6. Reddy K. High Level Expert Group (HLEG) report on Universal Health Coverage (UHC) for  
54 India. New Delhi: Public Health Foundation of India, 2011.  
55  
56  
57  
58  
59  
60

- 1  
2  
3 7. Shahrawat R, Rao KD. Insured yet vulnerable: out-of-pocket payments and India's poor. *Health policy and planning* 2012;27(3):213-21. doi: 10.1093/heapol/czr029
- 4  
5 8. Khatib R, McKee M, Shannon H, et al. Availability and affordability of cardiovascular  
6 disease medicines and their effect on use in high-income, middle-income, and low-  
7 income countries: an analysis of the PURE study data. *Lancet* 2016;387(10013):61-9.  
8 doi: 10.1016/S0140-6736(15)00469-9
- 9  
10 9. van Mourik MS, Cameron A, Ewen M, et al. Availability, price and affordability of  
11 cardiovascular medicines: a comparison across 36 countries using WHO/HAI data.  
12 *BMC Cardiovasc Disord* 2010;10:25. doi: 10.1186/1471-2261-10-25
- 13  
14 10. Mahal A, Karan A, Fan VY, et al. The economic burden of cancers on Indian households.  
15 *PloS one* 2013;8(8):e71853. doi: 10.1371/journal.pone.0071853
- 16  
17 11. Karan A, Engulgau M, Mahal A. The household-level economic burden of heart disease in  
18 India. *Trop Med Int Health* 2014;19(5):581-91. doi: 10.1111/tmi.12281
- 19  
20 12. Engulgau MM, Karan A, Mahal A. The Economic impact of Non-communicable Diseases  
21 on households in India. *Globalization and health* 2012;8:9. doi: 10.1186/1744-8603-  
22 8-9
- 23  
24 13. Khan JAM, Ahmed S, Evans TG. Catastrophic healthcare expenditure and poverty related  
25 to out-of-pocket payments for healthcare in Bangladesh-an estimation of financial  
26 risk protection of universal health coverage. *Health policy and planning*  
27 2017;32(8):1102-10. doi: 10.1093/heapol/czx048
- 28  
29 14. Ghosh S. Catastrophic Payments and Impoverishment due to Out-of-Pocket Health  
30 Spending. *Econ Political Wkly* 2011;46(47)
- 31  
32 15. Selvaraj S, Karan A. Deepening health insecurity in India: evidence from national sample  
33 surveys since 1980s. . *Econ Political Wkly* 2009;44:55-60.
- 34  
35 16. Fan VY, Karan A, Mahal A. State health insurance and out-of-pocket health expenditures  
36 in Andhra Pradesh, India. *Int J Health Care Finance Econ* 2012;12(3):189-215. doi:  
37 10.1007/s10754-012-9110-5
- 38  
39 17. Van Doorslaer E ODO, Rannan-Eliya RP, Somanathan A, Adhikari SR, Garg CC, et al. .  
40 Effect of payments for health care on poverty estimates in 11 countries in Asia: an  
41 analysis of household survey data. *The Lancet* 2006;368:1357-64.
- 42  
43 18. Xu K, Evans, D.B., Kawabata, K., Zeramini, R., Klavus, J., Murray, C.J.L. Household  
44 catastrophic health expenditure: a multicountry analysis. *Lancet* 2003;362 111-17.
- 45  
46 19. GOI. Report of the Expert Group to Review the Methodology for Measurement of  
47 Poverty. New Delhi.: Planning Commission., 2014.
- 48  
49 20. Bank W. World Bank 2017 [Available from:  
50 <http://iresearch.worldbank.org/PovcalNet/FAQs.aspx>; 2017.
- 51  
52 21. Selvaraj S, Chokshi, M., Hasan, H., & Kumar, P. . Improving Governance and  
53 Accountability in India's Medicine Supply System. . New Delhi: Public Health  
54 Foundation of India., 2010.
- 55  
56 22. Prinja S, Bahuguna P, Tripathy JP, et al. Availability of medicines in public sector health  
57 facilities of two North Indian States. *BMC Pharmacol Toxicol* 2015;16:43. doi:  
58 10.1186/s40360-015-0043-8
- 59  
60 23. Kotwani A, Gurbani N, Sharma S, et al. Insights for policymakers from a medicine price  
survey in Rajasthan. *Indian J Med Res* 2009;129(4):451-4.
24. Kotwani A. Where are we now: assessing the price, availability and affordability of  
essential medicines in Delhi as India plans free medicine for all. *BMC health services  
research* 2013;13:285. doi: 10.1186/1472-6963-13-285

- 1  
2  
3 25. Alsan M SL, Eggleston K, Kammili N, Kolli P, Bhattacharya J. . Out-of-pocket health  
4 expenditures and antimicrobial resistance in low-income and middle-income  
5 countries: an economic analysis. . *Lancet Infect Dis* 2015;15(10):(10):1203-10.  
6  
7 26. Mackintosh M, Channon A, Karan A, et al. What is the private sector? Understanding  
8 private provision in the health systems of low-income and middle-income countries.  
9 *Lancet* 2016;388(10044):596-605. doi: 10.1016/S0140-6736(16)00342-1  
10  
11 27. Huffman MD, Rao KD, Pichon-Riviere A, et al. A cross-sectional study of the  
12 microeconomic impact of cardiovascular disease hospitalization in four low- and  
13 middle-income countries. *PloS one* 2011;6(6):e20821. doi:  
14 10.1371/journal.pone.0020821  
15  
16 28. Rao K, Bhatnagar A, Murphy A. Socio-economic inequalities in the financing of  
17 cardiovascular & diabetes inpatient treatment in India. *Indian J Med Res*  
18 2011;133:57-63.  
19  
20 29. Prinja S, Jagnoor J, Chauhan A, et al. Economic Burden of Hospitalization Due to Injuries  
21 in North India: A Cohort Study. *Int J Environ Res Public Health* 2016;13:673.  
22  
23 30. Karan A. Key indicators of morbidity, utilization and health expenditure - Tamil Nadu.  
24 New Dlehi: Public Health Foundation of India, 2017.  
25  
26 31. Kotwani A, Ewen M, Dey D, et al. Prices & availability of common medicines at six sites in  
27 India using a standard methodology. *Indian J Med Res* 2007;125(5):645-54.  
28  
29 32. GOI. Drug Price Control Order 1995. In: Pharmaceuticals. Do, ed. India, 1995.  
30  
31 33. NPPA. Drug Price Control Order 2013. India, 2016.  
32  
33 34. Sahay A, Jaikumar S. Does Pharmaceutical Price Regulation Result in Greater Access to  
34 Essential Medicines? Study of the impact of drug price control order on sales volume  
35 of drugs in India. Ahmedabad.: Indian Institute of Management., 2016.  
36  
37 35. Devadasan N, Seshadri, T., Trivedi, M., Criel, B. Promoting universal financial protection:  
38 evidence from the rashtriya Swasthya Bima Yojana (RSBY) in Gujarat, India. . *Health*  
39 *Res Policy Syst* 2013. ;11:1–29.  
40  
41 36. Prinja S, Chauhan AS, Karan A, et al. Impact of Publicly Financed Health Insurance  
42 Schemes on Healthcare Utilization and Financial Risk Protection in India: A  
43 Systematic Review. *PloS one* 2017;12(2):e0170996. doi:  
44 10.1371/journal.pone.0170996  
45  
46 37. Singh PV, Tatambhotla A, Kalvakuntla R, et al. Understanding public drug procurement in  
47 India: a comparative qualitative study of five Indian states. *BMJ Open* 2013;3(2) doi:  
48 10.1136/bmjopen-2012-001987  
49  
50 38. Ministry of Health and Family Welfare (MoHFW) GoI. NATIONAL HEALTH POLICY, 2017  
51 2017 [Available from:  
52 [https://www.nhp.gov.in//NHPfiles/national\\_health\\_policy\\_2017.pdf](https://www.nhp.gov.in//NHPfiles/national_health_policy_2017.pdf).  
53  
54  
55  
56  
57  
58  
59

Figure legend:

Figure 1: Frequency and monthly per person (a) total OOP and (b) medicine OOP spending on select disease conditions, 2014

Figure 2: Monthly per person total OOP payment, medicine OOP payment and consumption expenditure

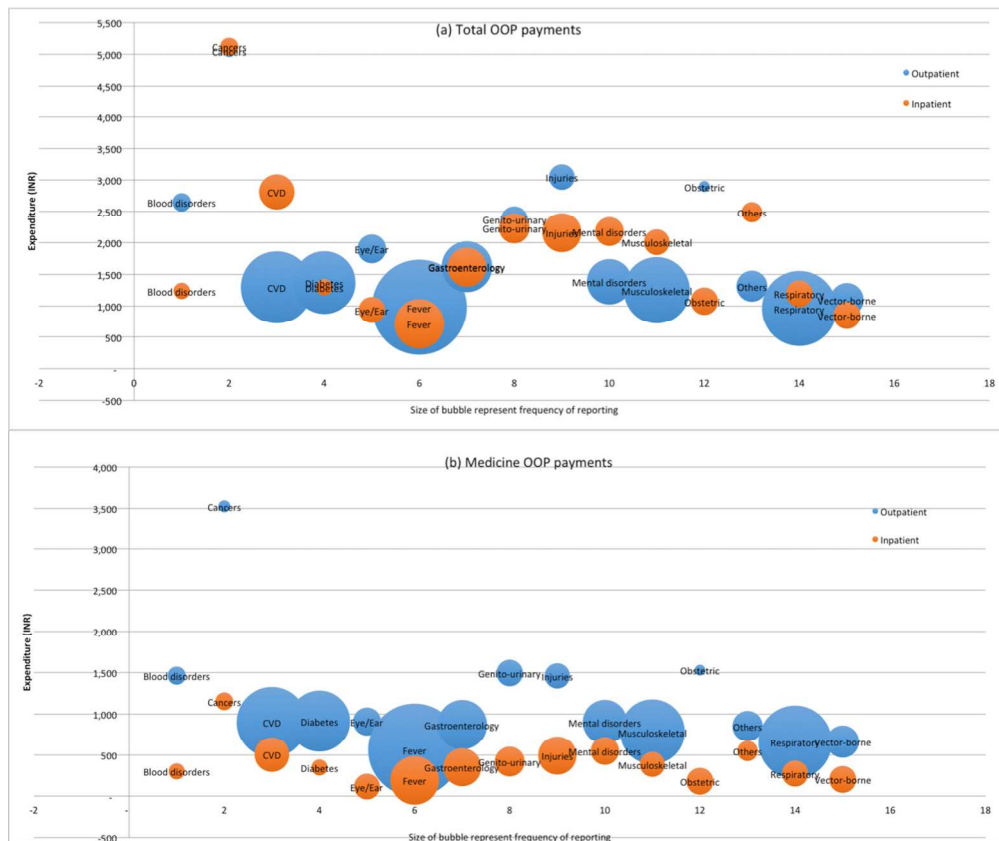

Frequency and monthly per person (a) total OOP and (b) medicine OOP spending on select disease conditions, 2014

228x190mm (300 x 300 DPI)

only

1  
2  
3  
4  
5  
6  
7  
8  
9  
10  
11  
12  
13  
14  
15  
16  
17  
18  
19  
20  
21  
22  
23  
24  
25  
26  
27  
28  
29  
30  
31  
32  
33  
34  
35  
36  
37  
38  
39  
40  
41  
42  
43  
44  
45  
46  
47  
48  
49  
50  
51  
52  
53  
54  
55  
56  
57  
58  
59  
60

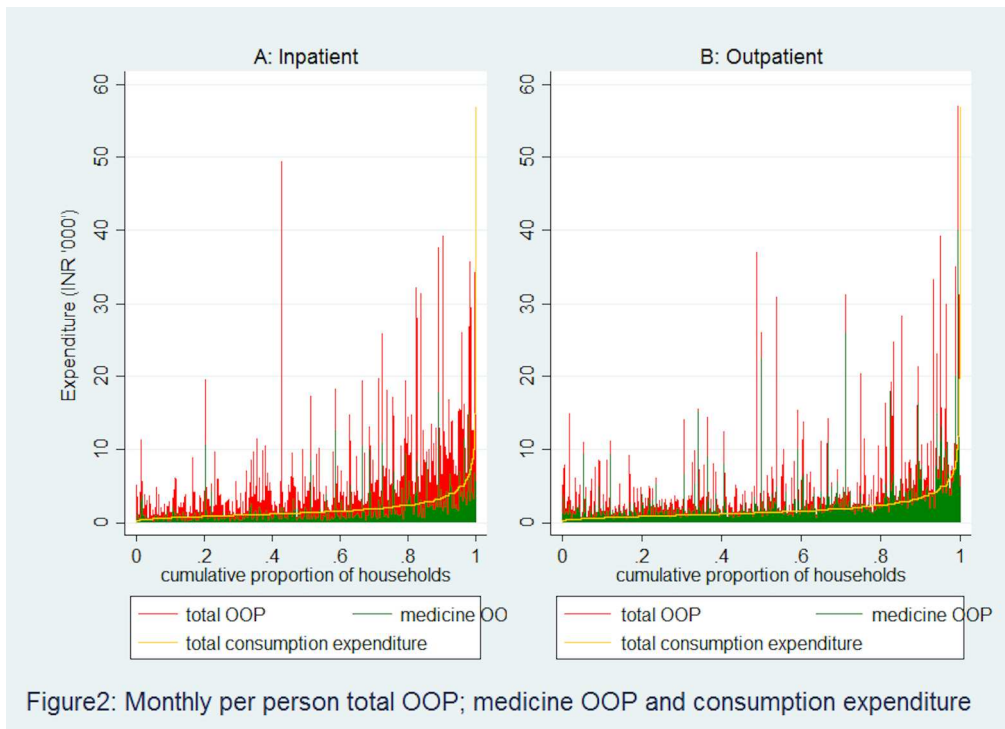

Figure2: Monthly per person total OOP; medicine OOP and consumption expenditure

Monthly per person total OOP payment, medicine OOP payment and consumption expenditure

302x219mm (300 x 300 DPI)

Peer Review Only

## Annexure

### Estimation of out-of-pocket expenditure indicators and related indicators

#### *a. Out-of-pocket payments*

Total out-of-pocket (OOP) payment has been defined as the summation of all kinds of direct expenditure on purchase of medical care including expenditure on family planning devices and transportation costs to access medical care by households either as inpatient or outpatient. According to the NSSO household questionnaire the main item of expenditure considered for inpatient and outpatient are presented in Table A-I.

Table A-I: Main items of expenditure considered for inpatient and outpatient in the NSSO questionnaire

| Inpatient                           |                                 | Outpatient                          |                                 |
|-------------------------------------|---------------------------------|-------------------------------------|---------------------------------|
| Heads of expenditure                | Item code in NSSO questionnaire | Heads of expenditure                | Item code in NSSO questionnaire |
| medicine                            | 410                             | medicine                            | 420                             |
| X-ray, ECG, pathological test, etc. | 411                             | X-ray, ECG, pathological test, etc. | 421                             |
| doctor's/surgeon's fee              | 412                             | doctor's/ surgeon's fee             | 422                             |
| hospital & nursing home charges     | 413                             | family planning devices             | 423                             |
| other medical expenses              | 414                             | other medical expenses              | 424                             |
| <b>Total inpatient</b>              | <b>419=410-414</b>              | <b>Total outpatient</b>             | <b>429=420-424</b>              |

The reference period of inpatient and outpatient expenditure in the consumer expenditure surveys are 1 year and 1 month respectively. Based on the information presented in Table A-I, total inpatient expenditure, outpatient expenditure and total OOP expenditure were estimated by converting inpatient expenditure for one month. Accordingly, households with any OOP have been defined as households reporting positive OOP (OOP>0) either as inpatient or outpatient or both.

#### *b. Per person monthly OOP and OOP share*

Per person monthly OOP is defined as total monthly OOP divided by household size for each household.

The financial burden of health expenses by households has also been estimated in terms of OOP as a share of total household expenditure and alternatively as a share of total non-food expenditure of households..

$$Sh_{OOP} = T / exp \dots\dots\dots (A.1)$$

Where, 'T' is total OOP payments and 'exp' is household total (non-food) expenditure by households.

**c. Catastrophic payments and headcount**

Further, OOP payments are defined as catastrophic when OOP payments as a portion of total household resources are in excess of a certain threshold. A household is said to have incurred catastrophic payments if  $T/exp > Z$ , where 'T' and OOP are the same as in equation (A.1) and 'Z' is a certain threshold. The latter is arbitrary and in general, estimates are presented for a range of values for z (5, 10, 15, 25 and 40 per cent).

Accordingly, the headcount ratio of catastrophic payment is calculated as follows:

$$cat_i = \frac{1}{n} \sum 1 \left( \frac{T}{exp} > Z_i \right) \dots\dots\dots (A.2)$$

Where,  $Cat_i$  is catastrophic headcounts of households with OOP share exceeding a threshold defined as 'i' per cent of total household total (non-food) expenditure, 1(.) is an indicator function, which takes the value 1 if  $T/exp > Z_i$  is true and 0 otherwise; n is the number of households incurring expenditure on health for various thresholds;  $Z_1, Z_2, Z_3 \dots\dots$  are the respective thresholds of the OOP share.

**d. Poverty headcount**

The usual headcount ratio of poverty is calculated as:

$$Gross HP = 1/n \sum 1 (xi \leq PL) \dots\dots\dots (A.3)$$

where: 1(.) is a function, taking the value 1 if person belong to a household with consumption expenditure lower the value of poverty line value, x= Household total consumption expenditure; PL= Poverty Line and n is total population.

Headcount of poverty after deducting OOP from household consumption expenditure can be defined as:



1  
2  
3  
4  
5  
6  
7  
8  
9  
10  
11  
12  
13  
14  
15  
16  
17  
18  
19  
20  
21  
22  
23  
24  
25  
26  
27  
28  
29  
30  
31  
32  
33  
34  
35  
36  
37  
38  
39  
40  
41  
42  
43  
44  
45  
46

$$Net\ HP = 1/n \sum 1 ((xi-T) \leq PL) \dots\dots\dots (A.4)$$

where: T= per capita OOP

The OOP induced poverty headcount finally is estimated as: (Gross HP - Net HP).

**e. Poverty gap**

Poverty gap is defined as difference between values of poverty lines and household consumption expenditure for the poor as defined in the sub-section d above. Using the household level data poverty gap for the poor is estimated as follows:

$$Gross\ poverty\ gap = 1/n \sum 1 (xi - PL) | \text{ if } i=\text{poor} \dots\dots\dots (A.5)$$

In equation A.5 'xi-PL' is the difference between household expenditure per person and poverty line. For all positive values of this difference mean gap is estimated. Finally, poverty gap net of OOP payments is estimated as follows:

$$Net\ poverty\ gap = 1/n \sum 1 ((xi-T) - PL) | \text{ if } i=\text{poor after netting OOP} \dots\dots\dots (A.6)$$

Table A-II. Prevalence and average per episode total and medicine out of pocket payments by disease conditions in 2014

|                    | Outpatient 15 days recall |       |             |      |                   |      | Inpatient 365 days recall |       |             |      |                   |      |
|--------------------|---------------------------|-------|-------------|------|-------------------|------|---------------------------|-------|-------------|------|-------------------|------|
|                    | Prevalence                |       | Per episode |      | estimated monthly |      | Prevalence                |       | Per episode |      | estimated monthly |      |
| Ailment            | Number of episodes        | %     | Total OOP   | Drug | Total OOP         | Drug | Number of episodes        | %     | Total OOP   | Drug | Total OOP         | Drug |
| Fever              | 2,71,43,431               | 22.71 | 488         | 280  | 975               | 561  | 74,12,043                 | 12.95 | 8670        | 2329 | 713               | 191  |
| TB/Filaria/Tetanus | 11,08,425                 | 0.93  | 524         | 287  | 1047              | 573  | 6,14,933                  | 1.07  | 14731       | 4134 | 1,211             | 340  |
| STD/HIV/AIDS       | 1,20,714                  | 0.1   | 538         | 268  | 1076              | 536  | 88,935                    | 0.16  | 6906        | 1633 | 568               | 134  |
| Vector-borne       | 33,33,651                 | 2.79  | 549         | 332  | 1097              | 663  | 22,65,189                 | 3.96  | 10288       | 2460 | 846               | 202  |

|                         |             |       |      |          |      |          |             |       |       |           |       |           |
|-------------------------|-------------|-------|------|----------|------|----------|-------------|-------|-------|-----------|-------|-----------|
| Cancers                 | 4,52,513    | 0.38  | 2527 | 176<br>3 | 5054 | 352<br>6 | 9,78,764    | 1.71  | 62297 | 1403<br>7 | 5,121 | 1,15<br>4 |
| Blood disease           | 10,26,129   | 0.86  | 1322 | 731      | 2643 | 146<br>3 | 8,10,752    | 1.42  | 15035 | 3650      | 1,236 | 300       |
| Diabetes                | 1,17,55,081 | 9.84  | 683  | 456      | 1367 | 911      | 8,17,199    | 1.43  | 15746 | 4224      | 1,294 | 347       |
| Other Metabolic         | 20,50,282   | 1.72  | 712  | 340      | 1423 | 679      | 2,60,707    | 0.46  | 15429 | 3600      | 1,268 | 296       |
| Mental disorders        | 61,56,374   | 5.15  | 690  | 451      | 1380 | 902      | 24,87,836   | 4.35  | 26428 | 6685      | 2,172 | 549       |
| Eye/Ear                 | 24,67,286   | 2.06  | 950  | 454      | 1899 | 908      | 20,82,420   | 3.64  | 11350 | 1407      | 933   | 116       |
| Cardiovascular diseases | 1,55,65,223 | 13.02 | 645  | 449      | 1289 | 899      | 37,82,374   | 6.61  | 34167 | 6129      | 2,808 | 504       |
| Respiratory diseases    | 1,69,58,670 | 14.19 | 478  | 328      | 955  | 656      | 21,40,762   | 3.74  | 14491 | 3325      | 1,191 | 273       |
| Gastroenterology        | 77,13,330   | 6.45  | 809  | 434      | 1617 | 869      | 45,40,520   | 7.93  | 19587 | 4260      | 1,610 | 350       |
| Skin                    | 28,34,892   | 2.37  | 522  | 370      | 1043 | 740      | 3,80,346    | 0.66  | 12123 | 3514      | 996   | 289       |
| Musculo-Skeletal        | 1,32,29,065 | 11.07 | 622  | 391      | 1244 | 782      | 19,66,211   | 3.44  | 24379 | 4677      | 2,004 | 384       |
| Genito-Urinary          | 21,91,953   | 1.83  | 1183 | 747      | 2365 | 149<br>4 | 28,01,133   | 4.89  | 27085 | 5094      | 2,226 | 419       |
| Obstetric               | 3,64,060    | 0.3   | 1448 | 765      | 2896 | 152<br>9 | 22,64,628   | 3.96  | 13050 | 2189      | 1,073 | 180       |
| Injuries                | 19,93,646   | 1.67  | 1522 | 730      | 3045 | 146<br>0 | 46,19,876   | 8.07  | 26242 | 6000      | 2,157 | 493       |
| Others                  | 28,92,298   | 2.42  | 655  | 426      | 1310 | 853      | 12,97,049   | 2.27  | 30196 | 6666      | 2,482 | 548       |
| Childbirth              | 1,46,562    | 0.12  | 585  | 398      | 1169 | 797      | 1,56,17,000 | 27.29 | 8508  | 1729      | 699   | 142       |

# BMJ Open

## Quantifying the financial burden of households' out-of-pocket payments on medicines in India. A repeated cross-section analysis of National Sample Survey data 1994 to 2014

|                                 |                                                                                                                                                                                                               |
|---------------------------------|---------------------------------------------------------------------------------------------------------------------------------------------------------------------------------------------------------------|
| Journal:                        | <i>BMJ Open</i>                                                                                                                                                                                               |
| Manuscript ID                   | bmjopen-2017-018020.R2                                                                                                                                                                                        |
| Article Type:                   | Research                                                                                                                                                                                                      |
| Date Submitted by the Author:   | 18-Jan-2018                                                                                                                                                                                                   |
| Complete List of Authors:       | Selvaraj, Sakthivel; Public Health Foundation of India, Farooqui, Habib; Public Health Foundation of India, Karan, Anup; Indian Institute of Public Health, Delhi (IIPHD), Public Health Foundation of India, |
| <b>Primary Subject Heading</b>: | Health economics                                                                                                                                                                                              |
| Secondary Subject Heading:      | Health policy                                                                                                                                                                                                 |
| Keywords:                       | HEALTH ECONOMICS, Health policy < HEALTH SERVICES ADMINISTRATION & MANAGEMENT, PUBLIC HEALTH                                                                                                                  |
|                                 |                                                                                                                                                                                                               |

SCHOLARONE™  
Manuscripts

**Title page**

Title of the article:

Quantifying the financial burden of households' out-of-pocket payments on medicines in India. A repeated cross-section analysis of National Sample Survey data 1994 to 2014

Full name, postal address, e-mail and telephone number of the corresponding author:

Dr. Habib Hasan Farooqui, MD

Associate Professor

Address: Public Health Foundation of India, Plot No. 47, Sector 44, Institutional Area, Gurugram, India -122001

Email: drhabibhasan@gmail.com

Phone: +91 9999984673

Full name, department, institution, city and country of all co-authors:

Dr. Sakthivel Selvaraj, PhD

Director,

Address: Public Health Foundation of India, Plot No. 47, Sector 44, Institutional Area, Gurugram, India -122001

Dr. Habib Hasan Farooqui, MD

Associate Professor

Address: Public Health Foundation of India, Plot No. 47, Sector 44, Institutional Area, Gurugram, India -122001

Dr. Anup Karan, DPhil

Associate Professor,

Address: Public Health Foundation of India, Plot No. 47, Sector 44, Institutional Area, Gurugram, India -122001

## Quantifying the financial burden of households' out-of-pocket payments on medicines in India. A repeated cross-section analysis of National Sample Survey data 1994 to 2014

**Objective:** The objective of this research is to generate new evidence on financial implications of medicines out of pocket (OOP) payments for households. Another objective is to investigate which disease conditions contributed to a significant proportion of households' financial burden.

**Setting:** All Indian States including Union Territories, 1993-94 to 2014

**Design:** Repeated cross section household surveys

**Data:** Secondary data of nationwide Consumer Expenditure Surveys for the years 1993-94, 2004-05 and 2011-12 and one wave of Social Consumption: Health for the year 2014 from National Sample Survey Organisation.

**Outcome measures:** Out-of-pocket expenditure on healthcare in general and medicines in specific.

**Results:** Total OOP payments and medicines OOP payments were estimated to be 6.77% [CI: 6.70%, 6.84%] and 4.49% [4.45%, 4.54%] of total consumption expenditure respectively in the year 2011-12 which marked significant increase since 1993-94. These proportions were 11.46% [CI: 11.36%, 11.56%] and 7.60% [CI: 7.54%, 7.67%] of non-food expenditure respectively in the same year. It was observed that total OOP payments and medicines OOP payments were catastrophic for 17.9% [CI: 17.7%, 18.2%] and 11.2% [11.0%, 11.4%] households respectively in 2011-12 at the 10% of total consumption expenditure threshold, implying 29 million households incurred catastrophic out-of-pocket payments in the year 2011-12. Further, medicines out-of-pocket payments pushed 3.09% [CI: 2.99%, 3.20%], implying 38 million, persons into poverty in the year 2011-12. Among the leading cause of diseases that caused significant OOP payments are cancers, injuries, cardiovascular diseases, genito-urinary conditions and mental disorders.

**Conclusions:** Purchase of medicines constitute the single largest component of the total OOP payments by households. Hence, strengthening government intervention in providing medicines free in public health care facilities has the potential not only to considerably reduce medicines related spending and total OOP payments of households but also reduction in OOP induced poverty.

Key words: India, out of payment, medicine, catastrophic expenditure, and poverty

**Article summary****Strengths and limitations of this study**

1. The study used multiple points of time and nationally representative data set to highlight the financial burden of households OOP payments on medicines in India;
2. The paper links medicines out-of-pocket payments by households with leading disease conditions and identify key disease conditions which cause medicines out-of-pocket payments
3. The study has limitations as it uses arbitrary threshold for measuring catastrophic payments
4. The ailments, disease conditions and the associated OOP expenditure reported by the households in the survey are self-reports and not clinically diagnosed.

## Background

Households' in India bear significant financial burden on account of medical treatment, as the current prepayment and risk pooling mechanisms are inadequate. Since both government funding and social health insurance contributions are insufficient to meet health care needs of households, over three-fourth of all health care payments are paid out-of-pocket (OOP) at the point of service delivery while medicines purchase (approximately 63%) account for the single largest component of these payments.<sup>1</sup> Available literature suggests that OOP spending has dominated total OOP payments over the years.<sup>2</sup> Hence, it can be suggested that expenditure on medicines is major cause of catastrophe at the household level.<sup>3</sup>

India has the distinction of being pharmacy of the global south - supplies affordable, life saving, quality generic medicines. It ranks 4th in terms of volumes and 13th in terms of value of pharmaceuticals produced globally.<sup>4</sup> However, according to a WHO report around 68% of the Indian population have limited or no access to essential medicines.<sup>5</sup> In addition, literature suggests that over last two decades availability of free medicines in public health facilities has declined from 31.2% to 8.9 % for inpatient care and from 17.8% to 5.9% for outpatient care.<sup>6</sup> Another study demonstrated that medicines purchase alone constituted over 70% of overall OOP payments. In addition, the study demonstrated that by removing OOP payments for outpatient care on medicines, the percentage of people falling below poverty because of spending on health reduced to just 0.5 % whereas removing OOP payments for inpatient care resulted in a negligible decline in poverty headcount ratio and poverty gap highlighting the role of medicines expenditure in healthcare related impoverishment.<sup>7</sup>

Utilising impoverishment tool to measure affordability, one study assessed the impoverishment effect of medicines purchases by households in 16 low-and-middle income economies.<sup>8</sup> Comparing four key medicine prices to household income, and using World Bank poverty levels of US\$ 1.25 or US\$ 2 per day, the study concluded that a substantial number of people had to bear financial burden due to unaffordability of medicines. For example, it was pointed out that an originator brand atenolol purchase by individuals would push an additional 22% of population below the US\$ 1.25 per day measurement while even a generic equivalent of atenolol was likely to push about 7% of population below poverty levels in Philippines.<sup>9</sup> Analyzing economic implications of non-communicable disease in India, a few studies also reported in the past that households incur significant OOP payment burden in certain conditions like cardiovascular diseases (CVD) and cancers.<sup>10,11</sup> Using 2004 NSSO data, another study highlighted that hospitalization with CVD resulted in 12% higher odds of incurring catastrophic spending and 37% greater odds of falling into poverty compared to those hospitalized with communicable conditions. For cancer, the impact was greatest with the odds of catastrophic expenditures 170% higher than the odds of incurring catastrophic spending when hospital stays are due to a communicable disease condition.<sup>12</sup>

1  
2  
3 However these studies do not reflect on the relative contribution of medicine in total OOP  
4 burden for the diseases they analysed.  
5

6 Available evidence, both global and Indian, provides insights about the incidence of  
7 catastrophic payments and impoverishment impact of rising households OOP payments.<sup>2 3</sup>  
8  
9<sup>13-15</sup> The literature on equity dimensions involving both catastrophe and impoverishment  
10 has attempted to address complex methodological and statistical approaches in  
11 measurements. However, there is lack of evidence on catastrophe and impoverishment on  
12 account of household's medicine OOP expenditure not only from inpatient and outpatient  
13 treatment costs perspective but also from the disease specific dimension. Given that  
14 medicines contribute to more than 66.6% of out-of-pocket healthcare expenditure, the  
15 focus of this research is to explore the consequences of high medicines OOP spending at the  
16 household level. Further, we investigated which disease conditions are contributing to high  
17 financial burden on households. We attempted to answer - what is the relative burden of  
18 medicines OOP payments by households in total OOP payments, catastrophic and poverty  
19 headcounts? And which disease conditions cause a relatively higher financial disruption in  
20 the living status of households?  
21  
22  
23  
24  
25

## 26 **Materials and methods**

### 27 Data

28  
29 The study utilises secondary data from three waves of nationally representative 'Consumer  
30 Expenditure Surveys' (CES): 1993-94, 2004-05 and 2011-12, conducted by the National  
31 Sample Survey Organisation (NSSO). In addition, health and morbidity survey (HMS) 2014 of  
32 the NSSO was used for disease-wise distribution of OOP payment burden. While the sample  
33 size of CES varied between 100,000 to 125,000 thousand households across different  
34 rounds, the sample size in HMS 2014 was approximately 72,000 households.  
35  
36  
37

38 The CES collect socioeconomic and demographic information on households with key focus  
39 is on household spending on roughly 350 food and non-food items. Out-of-pocket medical  
40 expenses incurred by households are separately recorded for inpatient and outpatient  
41 services. The recall periods are one-year and 30-days for inpatient and outpatient expenses  
42 respectively. HMS collects detailed information on morbidity pattern, utilisation of health  
43 care services and associated expenditure by households. The HMS too separately records  
44 expenditure for inpatient and outpatient. However, unlike in CES the recall period for  
45 outpatient in HMS is 15 days.  
46  
47  
48  
49

50 Both CES and HMS are repeated cross-section surveys that are representative at the  
51 national and state levels. All districts of a state are included for sampling purposes.  
52 Households in CES are sampled evenly in quarterly sub-rounds beginning on 1 July and  
53 ending on 30 June of the following year, with equal numbers of households allotted in each  
54 quarterly sub-round, to address seasonality. In HMS, survey was completed in two sub-  
55  
56  
57  
58  
59  
60



1  
2  
3 rounds during January1 to June 30, 2014. All estimates in the present paper are sample  
4 weighted.  
5

#### 6 Outcome indicators

7  
8 Using CES, we estimated 4 household-level indicators involving financial burden of illness: i)  
9 per household member monthly OOP spending on medicines (inflation-adjusted), ii) OOP  
10 spending on medicines as a share of total household and non-food spending, and iii)  
11 percentage of households reporting catastrophic payments on medicines and iv) percentage  
12 of households slipping onto poverty after netting out medicines OOP payments from  
13 households' total consumption expenditure. Total OOP spending of households was  
14 estimated by adding together expenditure on components of OOP payments. For inpatient  
15 OOP payment, we considered institutional spending on medicines, X-ray, ECG, pathological  
16 tests etc., doctor's/surgeon's fee, hospital and nursing charges and other medical expenses.  
17 For outpatient OOP payment, the components of expenditure are medicines, X-ray, ECG,  
18 pathological tests etc., doctor's/surgeon's fee, family planning services and other medical  
19 expenses. Expenditure on medicines is directly reported in the data set, both for inpatient  
20 and outpatient services (see Table A-I in Annexure). All the analyses report mean OOP  
21 spending on two parallel tracks: aggregated (across components of OOP) OOP payments  
22 (henceforth referred to as 'total OOP') and OOP payments only on account of medicine  
23 purchase (henceforth referred to as medicine/drug OOP).  
24  
25  
26  
27  
28  
29

30  
31 Catastrophic payment for health care is defined as OOP payments being higher to a pre-  
32 defined threshold of total household consumption expenditure or alternatively household's  
33 non-food expenditure. For measuring catastrophic expenditure,<sup>2,9</sup> instead of sticking to a  
34 particular threshold, we considered a range of thresholds.<sup>2,16-18</sup> We also considered  
35 alternative thresholds as OOP spending as a share of household non-food expenditure. For  
36 OOP payment induced poverty estimates, we used two different poverty lines: i) Indian  
37 official state-specific rural and urban poverty lines<sup>19</sup> and ii) international poverty line based  
38 on US \$ 1 per day per person adjusted to US \$ 1.9 purchasing power parity (PPP) per day per  
39 person for the year 2011-12<sup>20</sup>. Yet another important poverty indicator, which particularly  
40 estimates magnitude of poverty deepening, is poverty gap. Using both the poverty lines  
41 separately, we also estimated mean poverty gaps for the poor. Details of the method used  
42 for catastrophic and poverty estimates are presented in Annexure.  
43  
44  
45  
46

47  
48 In addition, we used NSSO 2014 HMS data for estimating disease level total and medicine  
49 OOP spending separately for inpatient and outpatient. Unlike CES, OOP spending in HMS  
50 2014 has not been recorded as part of the total household consumption expenditure and  
51 instead of estimating disease-wise catastrophic headcount, we present distribution of  
52 disease conditions based on incidence of occurrence and range of OOP spending separately  
53 for outpatient (15 days recall converted for 30 days) and inpatient (365 days recall  
54  
55  
56  
57  
58  
59

converted for 30 days). This helped identifying disease conditions, separately for outpatient and inpatient, which are high frequency occurrence and greater incidence of OOP spending.

## Results

First, we present basic financial burden indicators for the years 1993-94, 2004-05 and 2011-12 in Table 1. Over 80% of populations are reportedly spending out-of-pocket while seeking treatment, during 2011-12. The proportion of population reporting any OOP payments have increased sharply from about 60% during 1993-94 to 80% percent in 2011-12. In respect to medicines spending, approximately every OOP spending is associated with expenditure on medicines. There was a significant increase (more than 50%) in household's total consumption expenditure in real terms from INR 517 in 1993-84 to INR 794 in 2011-12. However, during the same period total OOP payments increased by more than 100% from INR 26 in 1993-94 to INR 54 in 2011-12 in real terms. The rise in OOP payments on medicines has been more than 70% during the same period. Consequently, the share of spending on health from households' overall consumption expenditure have registered sharp increase during the past two decades, from a moderate 4.8% during 1993-94 to nearly 7% in 2011-12. If we were to net out food expenditure from total household consumption spending, which are considered a necessity, the share of health spending remained stagnant but as high as 11-12% percent during the period under consideration. It may be observed that in 2011-12 medicines alone contributed up to 67% of the total OOP payments.

Table 1: Financial burden indicators, India, 1993-94, 2004-05 and 2011-12

| Financial burden indicators                                                 | 1993-94              | 2004-05           | 2011-12           |
|-----------------------------------------------------------------------------|----------------------|-------------------|-------------------|
| <b>Percentage households reporting OOP payments</b>                         |                      |                   |                   |
| Any out-of-pocket payments (%)                                              | 59.2 [58.9, 59.5]    | 64.4 [64.2, 64.7] | 80.5 [80.2, 80.7] |
| Medicines out-of-pocket payments (%)                                        | 57.5 [57.3, 57.8]    | 63.6 [63.3, 63.8] | 79.0 [78.8, 79.3] |
| <b>Monthly per capita expenditure (INR at constant 1999-2000 prices*)</b>   |                      |                   |                   |
| Household consumption expenditure                                           | 517 [515, 519]       | 619 [616, 622]    | 794 [790, 799]    |
| Out-of-pocket expenditure on health                                         | 25.59 [24.61, 26.25] | 36.3 [35.7, 37.0] | 54.3 [53.3, 55.3] |
| Medicine out-of-pocket expenditure                                          | 20.86 [19.50, 21.25] | 26.0 [25.6, 26.4] | 36.1 [35.5, 36.8] |
| <b>Share of health to total household expenditure (%)</b>                   |                      |                   |                   |
| Share of total out-of-pocket expenditure to total household expenditure (%) | 4.84 [4.78, 4.91]    | 5.78 [5.72, 5.83] | 6.77 [6.70, 6.84] |

|                                                                                |                      |                      |                      |
|--------------------------------------------------------------------------------|----------------------|----------------------|----------------------|
| Share of medicine out-of-pocket expenditure to total household expenditure (%) | 3.93 [3.87, 3.98]    | 4.10 [4.06, 4.14]    | 4.49 [4.45, 4.54]    |
| <b>Share of health to non-food household expenditure (%)</b>                   |                      |                      |                      |
| Share of total OOP payments to non-food expenditure (%)                        | 12.37 [12.20, 12.55] | 10.82 [10.72, 10.91] | 11.46 [11.36, 11.56] |
| Share of medicines OOP payments to non-food expenditure (%)                    | 10.02 [9.88, 10.17]  | 7.68 [7.62, 7.75]    | 7.60 [7.54, 7.67]    |

Notes: 1. numbers in brackets are 95% confidence interval; 2. State and rural-urban specific consumer price indices were used to convert current prices values at the constant 1999-2000 prices. 3. The current prices values for monthly per capita total OOP are 15.7, 41.8 and 111.2 and for medicine OOP are 12.8, 29.8 and 73.9 (all in INR) for the years 1993-94, 2004-05 and 2011-12 respectively.

A higher burden of households' OOP payment is often associated with impoverishment and catastrophe. In Table 2, we present a set of catastrophic cut-offs measured as a share of OOP payments to total household consumption expenditure and non-food expenditure. Estimates for both total OOP payments as well as medicine OOP payments by households are presented.

**Table 2: Percentage of households incurring catastrophic payments with respect to total OOP spending and medicines OOP spending, 1993-94, 2004-05 and 2011-12**

| Financial Health Equity Measurements                             | 1993-94 (%)       | 2004-05 (%)       | 2011-12 (%)       | Estimated number of households (2011-12) |
|------------------------------------------------------------------|-------------------|-------------------|-------------------|------------------------------------------|
| <b>Cut-off for catastrophe using total household expenditure</b> |                   |                   |                   |                                          |
| Total OOP payment > 5%                                           | 26.9 [26.6, 27.1] | 28.7 [28.5, 30.0] | 35.3 [35.0, 35.6] | 9,01,07,225                              |
| Total OOP payment > 10%                                          | 13.9 [13.8, 14.2] | 14.6 [14.4, 14.8] | 17.9 [17.7, 18.2] | 4,56,91,766                              |
| Total OOP payment > 25%                                          | 3.9 [3.8, 4.0]    | 3.5 [3.4, 3.6]    | 4.3 [4.2, 4.4]    | 1,09,76,234                              |
| Medicines OOP payment > 5%                                       | 23.3 [23.0, 23.5] | 23.4 [23.2, 23.6] | 27.0 [26.7, 27.2] | 6,89,20,540                              |
| Medicines OOP payment > 10%                                      | 11.5 [11.3, 11.7] | 10.2 [10.2, 10.4] | 11.2 [11.0, 11.4] | 2,85,89,261                              |

|                                                           |                         |                         |                         |              |
|-----------------------------------------------------------|-------------------------|-------------------------|-------------------------|--------------|
| Medicines OOP payment > 25%                               | 02.9<br>[2.8,<br>2.9]   | 1.6 [1.5,<br>1.7]       | 1.8 [1.7,<br>1.9]       | 45,94,703    |
| <b>Cut-off for catastrophe using non-food expenditure</b> |                         |                         |                         |              |
| Total OOP payment > 5%                                    | 47.8<br>[47.5,<br>48.1] | 46.5<br>46.2,<br>46.8]  | 53.5<br>[53.2,<br>53.8] | 13,65,64,775 |
| Total OOP payment > 10%                                   | 34.8<br>[34.6,<br>35.1] | 31.0<br>[30.7,<br>31.2] | 34.9<br>[34.7,<br>35.2] | 8,90,86,180  |
| Total OOP payment > 25%                                   | 16.7<br>[16.5,<br>16.9] | 11.4<br>[11.2,<br>11.5] | 11.9<br>[11.7,<br>12.1] | 3,03,76,090  |
| Total OOP payment > 40%                                   | 9.7 [9.5,<br>9.9]       | 4.7 [4.6,<br>4.9]       | 4.9 [4.8,<br>5.0]       | 1,25,07,802  |
| Medicines OOP payment > 5%                                | 44.7<br>[44.4,<br>45.0] | 42.5<br>[42.2,<br>42.8] | 46.4<br>[46.1,<br>46.7] | 11,84,41,225 |
| Medicines OOP payment > 10%                               | 31.2<br>[31.0,<br>31.5] | 25.5<br>[25.3,<br>25.7] | 26.1<br>25.9,<br>26.4]  | 6,66,23,189  |
| Medicines OOP payment > 25%                               | 13.9<br>[13.7,<br>14.1] | 7.1 [7.0,<br>7.3]       | 6.3 [6.1,<br>6.4]       | 1,60,81,459  |
| Medicines OOP payment > 40%                               | 7.8 [7.6,<br>7.9]       | 2.2 [2.1,<br>2.3]       | 1.8 [1.7,<br>1.9]       | 45,94,703    |

Note: Figures in brackets are 95% confidence interval.

Over one-third of Indian households incurred OOP payments greater to 5% of total household expenditure in 2011-12. This percentage was lower in 1993-94 (27%) and 2004-05 (28%). At the 25% threshold of total household expenditure, over 4% households reported incurring OOP payments in 2011-12. This essentially translates to approximately 11 million Indian households. Out of these, more than 4.4 million households incurred such payments only on account of purchase of medicines. At a lower threshold of 10% of total household expenditure, the number of households facing catastrophe is approximately 46 millions, of which 29 million households incurred catastrophe on account of OOP payments on medicines alone. Considering only non-food expenditure of households as the basic living status variable, approximately similar number of households incurred medicines OOP payments in 2011-12 with OOP payments being as high as 40% of their non-food expenditure.

**Table 3: Impoverishment Indicators due to households' total OOP and medicine spending, India, 1993-94, 2004-05 and 2011-12**

|                                                       | 1993-94              | 2004-05              | 2011-12              | Estimated population in millions, (2011-12) |
|-------------------------------------------------------|----------------------|----------------------|----------------------|---------------------------------------------|
| <b>I. Using national poverty line*</b>                |                      |                      |                      |                                             |
| <i>1. Headcount ratio indicators (%)</i>              |                      |                      |                      |                                             |
| Gross Headcount                                       | 45.32 [45.03, 45.61] | 37.85 [37.58, 38.12] | 22.17 [21.92, 22.43] | 272                                         |
| Headcount net of total OOP                            | 49.52 [49.22, 49.81] | 42.68 [42.40, 42.95] | 26.65 [26.38, 26.92] | 327                                         |
| Total OOP payment induced poverty                     | 4.20 [4.07, 4.30]    | 4.83 [4.71, 4.94]    | 4.48 [4.35, 4.60]    | 55                                          |
| Headcount net of medicine OOP payment                 | 48.91 [48.61, 49.20] | 41.54 [41.27, 41.82] | 25.27 [25.00, 25.53] | 310                                         |
| Medicine OOP payment induced poverty                  | 3.59 [3.47, 3.69]    | 3.69 [3.59, 3.80]    | 3.09 [2.99, 3.20]    | 38                                          |
| <i>2. Poverty gap indicators (INR current prices)</i> |                      |                      |                      |                                             |
| Gross poverty gap#                                    | 63.3 [62.9, 63.8]    | 103.4 [102.7, 104.2] | 154.2 [152.3, 156.0] |                                             |
| Gap net of total OOP payment ##                       | 69.7 [69.3, 70.1]    | 115.8 [115.1, 116.5] | 182.8 [181.0, 184.7] |                                             |
| Total OOP payment induced gap###                      | 6.4 [6.3, 6.5]       | 12.4 [12.2, 12.6]    | 28.6 [28.0, 29.2]    |                                             |
| Gap net of medicine OOP payment ###                   | 68.9 [68.5, 69.3]    | 113.7 [113.0, 114.4] | 176.7 [174.9, 178.5] |                                             |
| Medicine OOP payment induced                          | 5.6 [5.5, 5.7]       | 10.3 [10.1, 10.4]    | 22.5 [22.0, 23.0]    |                                             |

|                                                       |                      |                      |                      |     |
|-------------------------------------------------------|----------------------|----------------------|----------------------|-----|
| gap###                                                |                      |                      |                      |     |
| <b>II. Using international poverty line**</b>         |                      |                      |                      |     |
| <i>1. Headcount ratio indicators (%)</i>              |                      |                      |                      |     |
| Gross Headcount                                       | 40.96 [40.67, 41.24] | 33.07 [32.81, 33.34] | 18.37 [18.13, 18.61] | 225 |
| Headcount net of total OOP payment                    | 44.92 [44.63, 45.21] | 37.38 [37.11, 37.65] | 22.41 [22.16, 22.67] | 275 |
| Total OOP payment induced poverty                     | 3.97 [3.85, 4.08]    | 4.31 [4.19, 4.42]    | 4.04 [3.92, 4.16]    | 50  |
| Headcount net of medicine OOP payment                 | 44.35 [44.06, 44.64] | 36.34 [36.08, 36.61] | 21.37 [21.11, 21.62] | 262 |
| Medicine OOP payment induced poverty                  | 3.39 [3.29, 3.50]    | 3.27 [3.17, 3.68]    | 2.99 [2.89, 3.10]    | 37  |
| <i>2. Poverty gap indicators (INR current prices)</i> |                      |                      |                      |     |
| Gross poverty gap#                                    | 59.3 [58.9, 59.7]    | 96.1 [95.3, 96.8]    | 150.7 [148.8, 152.7] |     |
| Gap net of total OOP payment ##                       | 65.4 [64.9, 65.8]    | 107.5 [106.8, 108.3] | 177.0 [175.1, 179.1] |     |
| Total OOP payment induced gap##                       | 6.1 [6.0, 6.2]       | 11.5 [11.2, 11.7]    | 26.3 [25.7, 27.0]    |     |
| Gap net of medicine OOP payment ###                   | 64.6 [64.2, 65.1]    | 105.8 [105.0, 106.5] | 172.0 [170.0, 174.0] |     |
| Medicine OOP payment induced gap###                   | 5.3 [5.2, 5.4]       | 9.7 [9.5, 9.9]       | 21.3 [20.7, 21.8]    |     |

Notes: based on Tendulkar Committee methods (poverty lines range between INR 695 in Odisha and INR 1018 in Kerala in rural and INR 861 in Odisha and INR 1169 in Haryana in urban areas among the major states); \*\* using USD 1.90 PPP at 2011-12 prices and mixed recall period of household consumption expenditure (INR equivalent to USD 1.90 PPP are 771.21 in rural and 945.41 in urban areas); # only for poor; ## only for poor net of total OOP; ### only for poor net of medicine OOP

1  
2  
3 Next, we present implications of total and medicine OOP payments on poverty estimates  
4 (Table 3). To facilitate interpretation, we present 3 basic headcount ratio indicators: i) gross  
5 headcount – percentage of population below poverty line, ii) net of OOP headcount –  
6 headcount – percentage of population below poverty line after netting out OOP payments from  
7 household consumption expenditure and iii) OOP payments induced poverty which is the  
8 difference of the first two reflecting rise in poverty ratio owing to OOP payments. The last  
9 two indicators are presented separately for total OOP payments and medicine OOP  
10 payments. Table 3 also provides estimates on poverty gap representing extent of poverty  
11 deepening in terms of monetary value. All these indicators are estimated using Indian  
12 official poverty line (Tendulkar Committee method) and international poverty line of US \$  
13 1.90 PPP.  
14  
15  
16  
17

18  
19 The difference in mean headcount measure of gross and net poverty ratios reflects the  
20 percentage of population falling below poverty line because of households' OOP payments  
21 on health care. The headcount ratio of households impoverished due to OOP payments was  
22 3.97% during 1993-94, which inched up to 4.30% in 2004-05 while in 2011-12 it was at  
23 4.04%, as per international poverty line. In terms of Indian state-specific official poverty  
24 lines, percentage of households falling below poverty line increased from 4.19% in 1993-94  
25 to 4.48% in 2011-12. This translates to 55 million persons in 2011-12. Out of this,  
26 approximately 38 million became poor only because they had to purchase medicines  
27 through OOP payments. Using the same measurement, the headcount measure for  
28 households OOP payments on medicines appear to have marginally declined from 3.58% in  
29 1993-94 to 3.09% during 2011-12 using the international poverty line. As far as poverty gap  
30 is concerned, based on the Indian official poverty line, total OOP payments and OOP  
31 payments on medicines resulted in poverty deepening among poor by INR 29 and INR 23  
32 respectively in 2011-12. Further poverty deepening because of total and medicines OOP  
33 payments sharply increased in 2012 compared to that in the years 2004-05 and 1993-94.  
34  
35  
36  
37  
38  
39

#### 40 OOP expenditure by disease conditions

41 We also conducted a disaggregated analysis on disease wise expenditure not only with  
42 reference to total OOP payments and medicines OOP payments but also by type of care -  
43 inpatient care versus outpatient care. The survey results suggested that most common  
44 health condition for seeking outpatient care was fever (22.7%) and for inpatient care was  
45 childbirth (27.3%). In addition, our estimates suggest that households incurred highest  
46 monthly per capita OOP spending both for inpatient and outpatient care on account of  
47 cancer treatment (INR 5,054 and INR 5,121 respectively) followed by injuries for outpatient  
48 care (INR 3,045) and cardiovascular events for inpatient care (INR 2,808).  
49  
50  
51

52  
53 We also mapped disease-wise expenditure, frequency of healthcare utilization and type of  
54 care to demonstrate that not only hospitalization but also outpatient care can lead to  
55 catastrophe and impoverishment of households (Figure 1). For example, our estimates  
56  
57  
58  
59

1  
2  
3 suggest that monthly per capita medicines OOP payments for cancer care were significantly  
4 higher in outpatient care as compared to the inpatient care. However, as far as total OOP  
5 spending for cancer treatment is concerned, it is almost similar across inpatient and  
6 outpatient but significantly higher compared to that for other disease conditions. In  
7 contrast, in respect to cardiovascular conditions, medicines OOP payments were similar for  
8 both inpatient and outpatient treatment but total OOP payments were significantly higher  
9 for inpatient treatment as against outpatient treatment. In treatments involving  
10 gastroenterology conditions, however, both medicines OOP payments and total OOP  
11 payments were higher for outpatient compared to inpatient treatment. Similarly, for mental  
12 disorders, medicines OOP payments were higher for outpatient care compared to inpatient  
13 but total OOP payments were almost similar both for outpatient and inpatient treatment.  
14 Therefore, it is noted that the average monthly medicines OOP payments were consistently  
15 higher for outpatient care as compared to inpatient care among key disease conditions. A  
16 relatively higher frequency of outpatient treatment visits compared to inpatient treatment  
17 coupled with a significantly larger medicines OOP payment may yield a higher incidence of  
18 catastrophe. A detailed estimate of prevalence and OOP payments by disease conditions  
19 cross-classified by inpatient and outpatient care are presented in Table A-II in Annexure.  
20  
21  
22  
23  
24  
25

26  
27 Further, we plotted outpatient and inpatient OOP payments and medicines related OOP  
28 payments with respect to households 'usual' consumption expenditure. In Figure 2,  
29 households are ranked from the poorest to the richest on the X-axis based on their mean  
30 monthly per person consumption expenditure and on the Y-axis mean monthly per person  
31 OOP expenditure (total and medicine) are measured separately for outpatient and  
32 inpatient. It is observed that for a number of households, average monthly outpatient  
33 expenditure is not only significantly higher in relation to household's non-medical  
34 consumption expenditure but the frequency of such events is also higher in outpatient care  
35 as compared to inpatient care. In Figure 2, the concentration of red (total OOP payment)  
36 and green (medicine OOP payment) spikes above the consumption expenditure on the right  
37 hand side of the graph which reflects that even among richer households total OOP and  
38 medicine OOP payments are significantly higher than total non-medical consumption  
39 expenditure of households. Moreover, concentration of medicine OOP payments above  
40 households' non-medical consumption expenditure is more prominent in case of outpatient  
41 compare to the inpatient episodes.  
42  
43  
44  
45  
46  
47

## 48 **Discussion and conclusion**

49  
50 Using standard methods of measuring catastrophe and impoverishment,<sup>17 18</sup> this paper  
51 demonstrates the financial burden of households' OOP payments on medicines in India,  
52 spanning two decades from 1993-94 to 2011-12. To our knowledge, this is a first attempt to  
53 link medicines' OOP spending to key diseases conditions. Two trends stand out clearly from  
54 our findings. First, the households' impoverishment on account of OOP expenditure is  
55  
56  
57  
58  
59  
60



1  
2  
3 rather high and continued to be so during the last two decades. The impoverishment  
4 burden is largely driven by households spending on medicines, which accounted for over  
5 three-fourth of all medical impoverishment in India. One of the reasons could be compared  
6 to OOP payments on medicines, hospitalization/bed charges in India are comparatively low,  
7 and often subsidized in the public sector. Second, as far the catastrophe measurement is  
8 concerned, applying a 10% threshold of OOP payment on overall consumption expenditure,  
9 an estimated 18% percent of Indian households appear to suffer financial catastrophe.  
10 Medicines' OOP expenditure alone contributed to an estimated 11% of financial  
11 catastrophe. In absolute numbers, this translates to a scenario where an estimated 46  
12 million households appear to face catastrophic expenditure on account of OOP payments  
13 while 29 million households faced such hardship because they had to pay for medicines  
14 from their pockets.  
15  
16  
17  
18  
19

20 Recent evidence from the National Health Accounts for India points out that during 2013-  
21 14, an estimated INR 1,331 per capita was spent on medicines, while households alone  
22 contributed INR 1,200 per capita, accounting for 90% of all medicines expenditure in the  
23 country.<sup>1</sup> On the other hand, past evidence about government expenditure on medicines in  
24 India, underscores that, on an average government spent about 10% percent of health  
25 expenditure on medicines. However, the national average masks significant underspending  
26 on medicines by several state governments, with many reportedly spending less than five  
27 percent of their health budgets.<sup>6</sup> Besides poor allocation of resources, except for a couple of  
28 Indian states, drug procurement and supply chain system is inefficient and ineffective  
29 leading to acute shortages of key essential medicines and chronic stock-outs in public health  
30 facilities.<sup>21-24</sup> This situation has resulted in physical unavailability of medicines. Drawing  
31 evidence from large sample surveys for the period from 1986-87 to 2004, it is reported the  
32 physical barrier to access to key essential medicines worsened during this period.<sup>15</sup> Supply  
33 of free drugs in government health system in the outpatient care setting, declined sharply  
34 from about 18% in 1986-87 to 5% in 2004. For the same period, drugs prescribed during  
35 hospitalization for free also declined significantly from one-third to about 9%.<sup>6</sup> As a result, it  
36 is pointed out the number of hospitalization episodes in which an ailing population paid out-  
37 of-pocket (OOP) payment, has risen dramatically from about 41% to close to 72%.<sup>6</sup> Further,  
38 it was observed that from the period spanning mid-1990s to 2004, patients visiting  
39 government health facilities did not receive medicines in over one-fourth of outpatient  
40 episodes. Affordability of medicines is an important access indicator, because it translates  
41 into poor access or no access for people who have low purchasing power.<sup>3</sup> The consumer  
42 behaviour theory also predicts that raising the price (via high OOP expenditure on medicines  
43 or high copayment) for a service in the public health sector will move more consumers into  
44 the private sector, depending on the elasticity of substitution and transaction costs in the  
45 public sector.<sup>25</sup>  
46  
47  
48  
49  
50  
51  
52  
53  
54  
55  
56  
57  
58  
59  
60

1  
2  
3 In view of inadequate availability of medicines in government health facilities, households  
4 end up accessing private facilities where they end up incurring significant OOP payment, in  
5 the absence of any financial risk protection. Past evidence suggests that the trend has  
6 sharpened in the last couple of decades. For instance, the percentage of population  
7 accessing private facilities for inpatient and outpatient treatment has accelerated  
8 significantly between 1986-87 and 2004. It may be observed that households accessing  
9 private hospital for inpatient care increased from around 40% to nearly 60% in rural India  
10 while urban India reported a rise from 40% to 68%.<sup>26</sup> During the same period, outpatient  
11 care visits in private facilities remained high at around 75% in 1986-87 in rural India and 73%  
12 in urban India stepped up to 78% and 80% respectively for rural and urban India.<sup>3</sup>

13  
14  
15  
16  
17 The other critical evidence emerging from this paper focuses on disease specific medicines  
18 expenditure. The results demonstrate a pattern where households' medicine spending is  
19 concentrated on low frequency, high-value spending and high frequency, high-value  
20 spending. By disease-wise classification, expenditure on treatment of cancers, CVDs and  
21 injuries, both for outpatient and inpatient care dominate the spending pattern. Available  
22 literature confirms such an expenditure pattern, wherein the share of non-communicable  
23 diseases (cardiovascular disease, diabetes, cancer, mental illness, injuries and others) in  
24 OOP health expenses has increased from 31.6% in 1995-96 to 47.3% in 2004.<sup>12</sup> The  
25 literature further indicates high odds of catastrophic hospitalization expenditures for certain  
26 NCDs. For example, the odds for catastrophic expenditure in cancer are nearly 170%  
27 greater, for cardiovascular diseases (CVD) and injuries nearly 22% greater than the odds due  
28 to infectious diseases. Other studies on cardiovascular diseases highlighted that CVD  
29 affected households had more outpatient visits and inpatient stays, spent extra money per  
30 hospitalization<sup>11</sup> and have high probability of incurring catastrophic expenditure compared  
31 to those using inpatient facilities for communicable conditions.<sup>27</sup> Another Indian study on  
32 socio-economic inequalities in financing of diabetes and cardiovascular disease reported  
33 that out-of-pocket payments for hospital treatment claimed a large share of annual  
34 household expenditures; 30% for CVD and 17% for diabetes.<sup>28</sup> In respect to injuries (both  
35 road traffic and non-road traffic), high incidence of catastrophic expenditure was 30%, and  
36 was significantly higher among those belonging to the lowest income quartile and with an  
37 inpatient stay greater than 7 days.<sup>29</sup>

38  
39  
40  
41  
42  
43  
44  
45  
46 Although public facilities have slightly stepped up their share in outpatient care in recent  
47 years, private sector continue to dominate both in outpatient and inpatient care in India.<sup>30</sup>  
48 As an increasing share of households' access private health facilities, private retail  
49 pharmacies have become a major source of supply of key essential medicines. While  
50 availability of medicines may per se is not a challenge in the private health care setting,  
51 affordability appears to act as critical barrier.<sup>31</sup> Thus, pricing of medicines and regulation  
52 around retail medicine prices becomes a key factor in improving affordability and thereby  
53 leading to a reduction in medicines related OOP payment burden. Although India had a  
54  
55  
56  
57  
58  
59  
60

1  
2  
3 progressive retail price cap policies since 1979, but over the years a policy of deregulation  
4 was followed.<sup>32</sup> In 2013, the Government of India promulgated the Drugs Price Control  
5 Order (DPCO), 2013 (DPCO, 2013) which primarily brought all essential drugs, based on  
6 National List of Essential Medicines, 2011, under price control.<sup>33</sup> An evaluation of new price  
7 regulation has highlighted that, while few of the medicines (37) had an increase in sales  
8 volume attributable to DPCO, majority of the medicines (52) had a negative impact on their  
9 sales volume due to DPCO. Overall, the DPCO may have had a negative impact in terms of  
10 sales volume of medicines under price control.<sup>34</sup> Given that the sales volume of price-  
11 capped medicines has declined, households OOP spending may continue to increase since  
12 over 80% of retail pharmacy market is not price-capped.  
13  
14  
15

16  
17 In order to improve access to health care and to provide financial risk protection to  
18 households, the central government and several state governments have been  
19 implementing a publicly funded health insurance programs since 2007, whose primary aim  
20 was to provide cashless treatment to economically vulnerable households for  
21 hospitalization episodes. Emerging evidence from micro as well as macro level studies point  
22 to a trend where such insurance schemes appear to have improved access to hospital care  
23 but have been ineffective in preventing financial catastrophe and impoverishment to  
24 households.<sup>2 35 36</sup> These bodies of evidence are in line with our findings that hospitalization  
25 based treatment cost constitute only one-third of India's morbidity burden. Despite  
26 implementation of several health insurance schemes, a majority of Indian population  
27 continues to incur a relatively significant medicines OOP payment while seeking outpatient  
28 care. It would be pertinent to highlight that the frequency of hospitalization is considerably  
29 smaller than outpatient visits in general, especially for non-communicable diseases (NCDs),  
30 which are chronic in nature that require multiple consultations and long-term or life-long  
31 medication support. Such medical conditions result in catastrophic expenditure for  
32 households even in the absence of hospitalization episodes. Moreover, since a relatively  
33 larger proportion of population seeks outpatient care in private facilities, which is often  
34 multiple times expensive than public health facilities, we observe a disproportionately  
35 higher burden of medicines related OOP payment for outpatient care.  
36  
37  
38  
39  
40  
41  
42  
43

44 The evidence presented in this paper, however, suffers from a few limitations. The first set  
45 of challenge relates to co-morbidities and associated expenditure. In respect to inpatient  
46 cases, since NSSO data captures disease expenditure separately for various disease  
47 conditions, the issue of co-morbid conditions did not play major role. However, for  
48 outpatient cases, we had to adopt apportioning technique to handle co-morbid conditions.  
49 The second set of challenge pertains to the potential recall bias for disease specific  
50 expenditures, which cannot be ruled out especially for hospitalization treatment since the  
51 recall period is a longer time span of 365 days. Lastly, although there are significant state  
52 level and rural-urban differentials in the estimates presented in this paper, we focused on  
53  
54  
55  
56  
57  
58  
59  
60

1  
2  
3 the All India average and believe that the state level and rural-urban analyses could be a  
4 potential research for the future.  
5

6  
7 The foregoing underlines several policy interventions and program design that were  
8 conceived and implemented in the recent past to provide financial risk protection to  
9 households. However, gross underinvestment in the public health system in past had led to  
10 inadequate prepayment and risk pooling measures.<sup>26</sup> Several policy interventions and  
11 program redesign are required to reverse the trend of high OOP expenditure for healthcare  
12 in India. An efficient and a reliable medicines supply chain model existed for over two and  
13 half decades in the state of Tamil Nadu, which was replicated in the state of Rajasthan in  
14 2012 have been instrumental in improving access to medicines in the frontline facilities in  
15 these two states.<sup>37</sup> Such policies and programs governing public health facilities are critical.  
16 The National Health Policy 2017 also highlighted the need for providing free medicines in  
17 public health facilities by stepping up funding and improving drug procurement and supply  
18 chain mechanisms.<sup>38</sup> A recent pronouncement by the government intends to bring  
19 legislation for physicians to prescribe drugs only in generic names, also holds promise for  
20 reducing households' OOP payments on medicines and ultimately providing financial risk  
21 protection. To sum up, both national and state governments' intervention is required for  
22 providing free medicines in public health facilities along with expanding the mechanism of  
23 price capping of key essential medicines in the private market.  
24  
25  
26  
27  
28  
29

30 Contributorship: AK and SS conceived the idea, designed the analysis, conducted data  
31 analysis and wrote the first draft of the paper. AK, SS and HHF conducted the literature  
32 review and the interpretation of the results. AS, SS and HHF revised and edited the  
33 manuscript to its final stages. All the authors approved the final manuscript version.  
34  
35

36  
37 Acknowledgments: None  
38

39  
40 Competing Interests: We declare no conflict of interest.  
41

42 Funding: Habib Hasan Farooqui is supported by a Wellcome Trust Capacity Strengthening  
43 Strategic Award to the Public Health Foundation of India and a consortium of UK  
44 universities. The funders had no role in study design, data collection and analysis, decision  
45 to publish, or preparation of the manuscript.  
46  
47  
48

49 Data sharing: The data used for the analysis is available in public domain.  
50

51 Ethical approval: Ethical approval for this study was not needed. The study used only  
52 anonymised data from secondary sources. Requisite permission to use the data has been  
53 obtained from the agency.  
54  
55  
56  
57  
58  
59

## Reference list:

1. (NHSRC). NHSRC. National Health Accounts Estimates for India 2013-14: Ministry of Health and Family Welfare (MoHFW). Government of India, 2014.
2. Karan A, Selvaraj S, Mahal A. Moving to universal coverage? Trends in the burden of out-of-pocket payments for health care across social groups in India, 1999-2000 to 2011-12. *PloS one* 2014;9(8):e105162. doi: 10.1371/journal.pone.0105162
3. Selvaraj S, Karan A. Deepening health insecurity in India: evidence from national sample surveys since 1980s. . *Econ Polit Wkly* 2009;44:55–60.
4. WHO. The World Medicines Situation 2011. Geneva: World Health Organization, 2011.
5. WHO. The World Medicine Situation 2004. Geneva: World Health Organization, 2004.
6. Reddy K. High Level Expert Group (HLEG) report on Universal Health Coverage (UHC) for India. New Delhi: Public Health Foundation of India, 2011.
7. Shahrawat R, Rao KD. Insured yet vulnerable: out-of-pocket payments and India's poor. *Health policy and planning* 2012;27(3):213-21. doi: 10.1093/heapol/czr029
8. Khatib R, McKee M, Shannon H, et al. Availability and affordability of cardiovascular disease medicines and their effect on use in high-income, middle-income, and low-income countries: an analysis of the PURE study data. *Lancet* 2016;387(10013):61-9. doi: 10.1016/S0140-6736(15)00469-9
9. van Mourik MS, Cameron A, Ewen M, et al. Availability, price and affordability of cardiovascular medicines: a comparison across 36 countries using WHO/HAI data. *BMC Cardiovasc Disord* 2010;10:25. doi: 10.1186/1471-2261-10-25
10. Mahal A, Karan A, Fan VY, et al. The economic burden of cancers on Indian households. *PloS one* 2013;8(8):e71853. doi: 10.1371/journal.pone.0071853
11. Karan A, Engelgau M, Mahal A. The household-level economic burden of heart disease in India. *Trop Med Int Health* 2014;19(5):581-91. doi: 10.1111/tmi.12281
12. Engelgau MM, Karan A, Mahal A. The Economic impact of Non-communicable Diseases on households in India. *Globalization and health* 2012;8:9. doi: 10.1186/1744-8603-8-9
13. Khan JAM, Ahmed S, Evans TG. Catastrophic healthcare expenditure and poverty related to out-of-pocket payments for healthcare in Bangladesh-an estimation of financial risk protection of universal health coverage. *Health policy and planning* 2017;32(8):1102-10. doi: 10.1093/heapol/czx048
14. Ghosh S. Catastrophic Payments and Impoverishment due to Out-of-Pocket Health Spending. *Econ Political Wkly* 2011;46(47)
15. Selvaraj S, Karan A. Deepening health insecurity in India: evidence from national sample surveys since 1980s. . *Econ Political Wkly* 2009;44:55–60.
16. Fan VY, Karan A, Mahal A. State health insurance and out-of-pocket health expenditures in Andhra Pradesh, India. *Int J Health Care Finance Econ* 2012;12(3):189-215. doi: 10.1007/s10754-012-9110-5
17. Van Doorslaer E ODO, Rannan-Eliya RP, Somanathan A, Adhikari SR, Garg CC, et al. . Effect of payments for health care on poverty estimates in 11 countries in Asia: an analysis of household survey data. *The Lancet* 2006;368:1357-64.
18. Xu K, Evans, D.B., Kawabata, K., Zeramdini, R., Klavus, J., Murray, C.J.L. Household catastrophic health expenditure: a multicountry analysis. *Lancet* 2003;362 111–17.
19. GOI. Report of the Expert Group to Review the Methodology for Measurement of Poverty. New Delhi.: Planning Commission., 2014.

- 1
- 2
- 3 20. Bank W. World Bank 2017 [Available from:  
4 <http://iresearch.worldbank.org/PovcalNet/FAQs.aspx>; 2017.
- 5 21. Selvaraj S, Chokshi, M., Hasan, H., & Kumar, P. . Improving Governance and  
6 Accountability in India's Medicine Supply System. . New Delhi: Public Health  
7 Foundation of India., 2010.
- 8 22. Prinja S, Bahuguna P, Tripathy JP, et al. Availability of medicines in public sector health  
9 facilities of two North Indian States. *BMC Pharmacol Toxicol* 2015;16:43. doi:  
10 10.1186/s40360-015-0043-8
- 11 23. Kotwani A, Gurbani N, Sharma S, et al. Insights for policymakers from a medicine price  
12 survey in Rajasthan. *Indian J Med Res* 2009;129(4):451-4.
- 13 24. Kotwani A. Where are we now: assessing the price, availability and affordability of  
14 essential medicines in Delhi as India plans free medicine for all. *BMC health services  
15 research* 2013;13:285. doi: 10.1186/1472-6963-13-285
- 16 25. Alsan M SL, Eggleston K, Kammili N, Kolli P, Bhattacharya J. . Out-of-pocket health  
17 expenditures and antimicrobial resistance in low-income and middle-income  
18 countries: an economic analysis. . *Lancet Infect Dis* 2015;15(10):(10):1203-10.
- 19 26. Mackintosh M, Channon A, Karan A, et al. What is the private sector? Understanding  
20 private provision in the health systems of low-income and middle-income countries.  
21 *Lancet* 2016;388(10044):596-605. doi: 10.1016/S0140-6736(16)00342-1
- 22 27. Huffman MD, Rao KD, Pichon-Riviere A, et al. A cross-sectional study of the  
23 microeconomic impact of cardiovascular disease hospitalization in four low- and  
24 middle-income countries. *PloS one* 2011;6(6):e20821. doi:  
25 10.1371/journal.pone.0020821
- 26 28. Rao K, Bhatnagar A, Murphy A. Socio-economic inequalities in the financing of  
27 cardiovascular & diabetes inpatient treatment in India. *Indian J Med Res*  
28 2011;133:57-63.
- 29 29. Prinja S, Jagnoor J, Chauhan A, et al. Economic Burden of Hospitalization Due to Injuries  
30 in North India: A Cohort Study. *Int J Environ Res Public Health* 2016;13:673.
- 31 30. Karan A. Key indicators of morbidity, utilization and health expenditure - Tamil Nadu.  
32 New Dlehi: Public Health Foundation of India, 2017.
- 33 31. Kotwani A, Ewen M, Dey D, et al. Prices & availability of common medicines at six sites in  
34 India using a standard methodology. *Indian J Med Res* 2007;125(5):645-54.
- 35 32. GOI. Drug Price Control Order 1995. In: Pharmaceuticals. Do, ed. India, 1995.
- 36 33. NPPA. Drug Price Control Order 2013. India, 2016.
- 37 34. Sahay A, Jaikumar S. Does Pharmaceutical Price Regulation Result in Greater Access to  
38 Essential Medicines? Study of the impact of drug price control order on sales volume  
39 of drugs in India. Ahmedabad.: Indian Institute of Management., 2016.
- 40 35. Devadasan N, Seshadri, T., Trivedi, M., Criel, B. Promoting universal financial protection:  
41 evidence from the rashtriya Swasthya Bima Yojana (RSBY) in Gujarat, India. . *Health  
42 Res Policy Syst* 2013. ;11:1-29.
- 43 36. Prinja S, Chauhan AS, Karan A, et al. Impact of Publicly Financed Health Insurance  
44 Schemes on Healthcare Utilization and Financial Risk Protection in India: A  
45 Systematic Review. *PloS one* 2017;12(2):e0170996. doi:  
46 10.1371/journal.pone.0170996
- 47 37. Singh PV, Tatambhotla A, Kalvakuntla R, et al. Understanding public drug procurement in  
48 India: a comparative qualitative study of five Indian states. *BMJ Open* 2013;3(2) doi:  
49 10.1136/bmjopen-2012-001987
- 50
- 51
- 52
- 53
- 54
- 55
- 56
- 57
- 58
- 59
- 60

1  
2  
3 38. Ministry of Health and Family Welfare (MoHFW) GoI. NATIONAL HEALTH POLICY, 2017  
4 2017 [Available from:  
5 [https://www.nhp.gov.in/NHPfiles/national\\_health\\_policy\\_2017.pdf](https://www.nhp.gov.in/NHPfiles/national_health_policy_2017.pdf).  
6  
7

8  
9 Figure legend:

10 Figure 1: Frequency and monthly per person (a) total OOP and (b) medicine OOP spending  
11 on select disease conditions, 2014  
12

13 Figure 2: Monthly per person total OOP payment, medicine OOP payment and consumption  
14 expenditure  
15

16  
17  
18  
19  
20  
21  
22  
23  
24  
25  
26  
27  
28  
29  
30  
31  
32  
33  
34  
35  
36  
37  
38  
39  
40  
41  
42  
43  
44  
45  
46  
47  
48  
49  
50  
51  
52  
53  
54  
55  
56  
57  
58  
59  
60

For peer review only



Frequency and monthly per person (a) total OOP and (b) medicine OOP spending on select disease conditions, 2014

228x190mm (300 x 300 DPI)

only



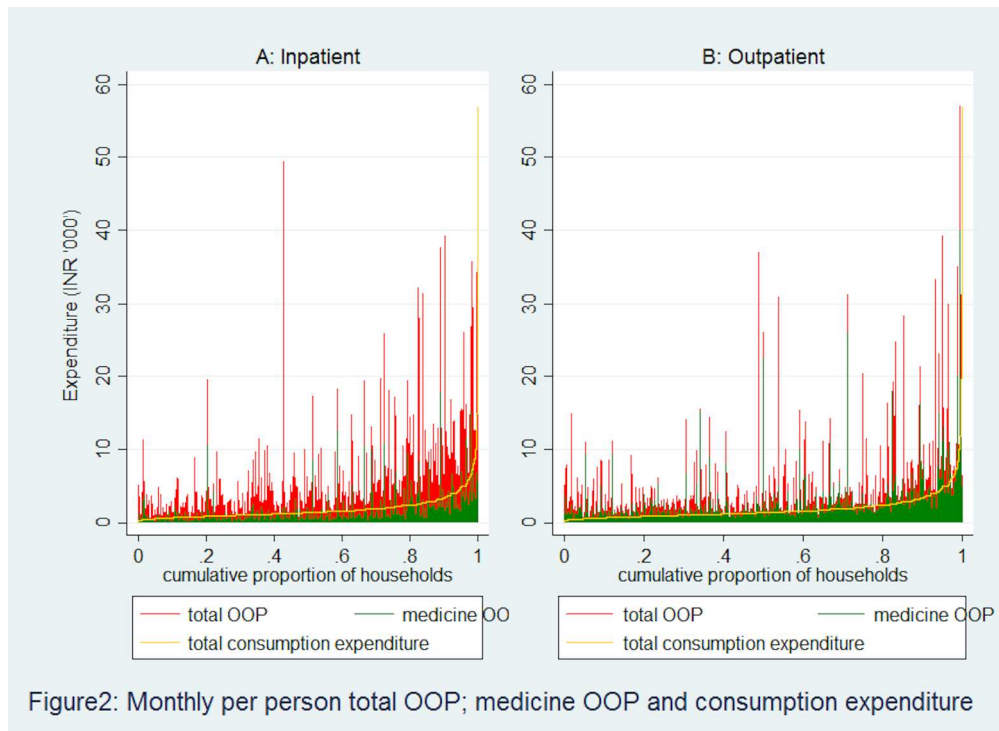

Monthly per person total OOP payment, medicine OOP payment and consumption expenditure

302x219mm (300 x 300 DPI)

Annexure

Estimation of out-of-pocket expenditure indicators and related indicators

a. Out-of-pocket payments

Total out-of-pocket (OOP) payment has been defined as the summation of all kinds of direct expenditure on purchase of medical care including expenditure on family planning devices and transportation costs to access medical care by households either as inpatient or outpatient. According to the NSSO household questionnaire the main item of expenditure considered for inpatient and outpatient are presented in Table A-I.

Table A-I: Main items of expenditure considered for inpatient and outpatient in the NSSO questionnaire

| Inpatient                           |                                 | Outpatient                          |                                 |
|-------------------------------------|---------------------------------|-------------------------------------|---------------------------------|
| Heads of expenditure                | Item code in NSSO questionnaire | Heads of expenditure                | Item code in NSSO questionnaire |
| medicine                            | 410                             | medicine                            | 420                             |
| X-ray, ECG, pathological test, etc. | 411                             | X-ray, ECG, pathological test, etc. | 421                             |
| doctor's/surgeon's fee              | 412                             | doctor's/ surgeon's fee             | 422                             |
| hospital & nursing home charges     | 413                             | family planning devices             | 423                             |
| other medical expenses              | 414                             | other medical expenses              | 424                             |
| <b>Total inpatient</b>              | <b>419=410-414</b>              | <b>Total outpatient</b>             | <b>429=420-424</b>              |

The reference period of inpatient and outpatient expenditure in the consumer expenditure surveys are 1 year and 1 month respectively. Based on the information presented in Table A-I, total inpatient expenditure, outpatient expenditure and total OOP expenditure were estimated by converting inpatient expenditure for one month. Accordingly, households with any OOP have been defined as households reporting positive OOP (OOP>0) either as inpatient or outpatient or both.

b. Per person monthly OOP and OOP share

Per person monthly OOP is defined as total monthly OOP divided by household size for each household.

The financial burden of health expenses by households has also been estimated in terms of OOP as a share of total household expenditure and alternatively as a share of total non-food expenditure of households..

$$Sh_{OOP} = T / exp \dots\dots\dots (A.1)$$

Where, 'T' is total OOP payments and 'exp' is household total (non-food) expenditure by households.

### ***c. Catastrophic payments and headcount***

Further, OOP payments are defined as catastrophic when OOP payments as a portion of total household resources are in excess of a certain threshold. A household is said to have incurred catastrophic payments if  $T/exp > Z$ , where 'T' and OOP are the same as in equation (A.1) and 'Z' is a certain threshold. The latter is arbitrary and in general, estimates are presented for a range of values for z (5, 10, 15, 25 and 40 per cent).

Accordingly, the headcount ratio of catastrophic payment is calculated as follows:

$$cat_i = \frac{1}{n} \sum 1 \left( \frac{T}{exp} > Z_i \right) \dots\dots\dots (A.2)$$

Where,  $Cat_i$  is catastrophic headcounts of households with OOP share exceeding a threshold defined as 'i' per cent of total household total (non-food) expenditure,  $1(.)$  is an indicator function, which takes the value 1 if  $T/exp > Z_i$  is true and 0 otherwise; n is the number of households incurring expenditure on health for various thresholds;  $Z_1, Z_2, Z_3 \dots\dots$  are the respective thresholds of the OOP share.

### ***d. Poverty headcount***

The usual headcount ratio of poverty is calculated as:

$$Gross HP = 1/n \sum 1 (xi \leq PL) \dots\dots\dots (A.3)$$

where:  $1(.)$  is a function, taking the value 1 if person belong to a household with consumption expenditure lower the value of poverty line value, x= Household total consumption expenditure; PL= Poverty Line and n is total population.

Headcount of poverty after deducting OOP from household consumption expenditure can be defined as:

1  
2  
3  
4  
5  
6  
7  
8  
9  
10  
11  
12  
13  
14  
15  
16  
17  
18  
19  
20  
21  
22  
23  
24  
25  
26  
27  
28  
29  
30  
31  
32  
33  
34  
35  
36  
37  
38  
39  
40  
41  
42  
43  
44  
45  
46

$$Net\ HP = 1/n \sum 1 ((xi-T) \leq PL). \dots\dots\dots (A.4)$$

where: T= per capita OOP

The OOP induced poverty headcount finally is estimated as: (Gross HP - Net HP).

**e. Poverty gap**

Poverty gap is defined as difference between values of poverty lines and household consumption expenditure for the poor as defined in the sub-section d above. Using the household level data poverty gap for the poor is estimated as follows:

$$Gross\ poverty\ gap = 1/n \sum 1 (xi - PL) | \text{ if } i=\text{poor} \dots\dots\dots (A.5)$$

In equation A.5 'xi-PL' is the difference between household expenditure per person and poverty line. For all positive values of this difference mean gap is estimated. Finally, poverty gap net of OOP payments is estimated as follows:

$$Net\ poverty\ gap = 1/n \sum 1 ((xi-T) - PL) | \text{ if } i=\text{poor after netting OOP} \dots\dots\dots (A.6)$$

Table A-II. Prevalence and average per episode total and medicine out of pocket payments by disease conditions in 2014

| Ailment            | Outpatient 15 days recall |       |             |      |                   |      | Inpatient 365 days recall |       |             |      |                   |      |
|--------------------|---------------------------|-------|-------------|------|-------------------|------|---------------------------|-------|-------------|------|-------------------|------|
|                    | Prevalence                |       | Per episode |      | estimated monthly |      | Prevalence                |       | Per episode |      | estimated monthly |      |
|                    | Number of episodes        | %     | Total OOP   | Drug | Total OOP         | Drug | Number of episodes        | %     | Total OOP   | Drug | Total OOP         | Drug |
| Fever              | 2,71,43,431               | 22.71 | 488         | 280  | 975               | 561  | 74,12,043                 | 12.95 | 8670        | 2329 | 713               | 191  |
| TB/Filaria/Tetanus | 11,08,425                 | 0.93  | 524         | 287  | 1047              | 573  | 6,14,933                  | 1.07  | 14731       | 4134 | 1,211             | 340  |
| STD/HIV/AIDS       | 1,20,714                  | 0.1   | 538         | 268  | 1076              | 536  | 88,935                    | 0.16  | 6906        | 1633 | 568               | 134  |
| Vector-borne       | 33,33,651                 | 2.79  | 549         | 332  | 1097              | 663  | 22,65,189                 | 3.96  | 10288       | 2460 | 846               | 202  |

|                         |             |       |      |          |      |          |             |       |       |           |       |           |
|-------------------------|-------------|-------|------|----------|------|----------|-------------|-------|-------|-----------|-------|-----------|
| Cancers                 | 4,52,513    | 0.38  | 2527 | 176<br>3 | 5054 | 352<br>6 | 9,78,764    | 1.71  | 62297 | 1403<br>7 | 5,121 | 1,15<br>4 |
| Blood disease           | 10,26,129   | 0.86  | 1322 | 731      | 2643 | 146<br>3 | 8,10,752    | 1.42  | 15035 | 3650      | 1,236 | 300       |
| Diabetes                | 1,17,55,081 | 9.84  | 683  | 456      | 1367 | 911      | 8,17,199    | 1.43  | 15746 | 4224      | 1,294 | 347       |
| Other Metabolic         | 20,50,282   | 1.72  | 712  | 340      | 1423 | 679      | 2,60,707    | 0.46  | 15429 | 3600      | 1,268 | 296       |
| Mental disorders        | 61,56,374   | 5.15  | 690  | 451      | 1380 | 902      | 24,87,836   | 4.35  | 26428 | 6685      | 2,172 | 549       |
| Eye/Ear                 | 24,67,286   | 2.06  | 950  | 454      | 1899 | 908      | 20,82,420   | 3.64  | 11350 | 1407      | 933   | 116       |
| Cardiovascular diseases | 1,55,65,223 | 13.02 | 645  | 449      | 1289 | 899      | 37,82,374   | 6.61  | 34167 | 6129      | 2,808 | 504       |
| Respiratory diseases    | 1,69,58,670 | 14.19 | 478  | 328      | 955  | 656      | 21,40,762   | 3.74  | 14491 | 3325      | 1,191 | 273       |
| Gastroenterology        | 77,13,330   | 6.45  | 809  | 434      | 1617 | 869      | 45,40,520   | 7.93  | 19587 | 4260      | 1,610 | 350       |
| Skin                    | 28,34,892   | 2.37  | 522  | 370      | 1043 | 740      | 3,80,346    | 0.66  | 12123 | 3514      | 996   | 289       |
| Musculo-Skeletal        | 1,32,29,065 | 11.07 | 622  | 391      | 1244 | 782      | 19,66,211   | 3.44  | 24379 | 4677      | 2,004 | 384       |
| Genito-Urinary          | 21,91,953   | 1.83  | 1183 | 747      | 2365 | 149<br>4 | 28,01,133   | 4.89  | 27085 | 5094      | 2,226 | 419       |
| Obstetric               | 3,64,060    | 0.3   | 1448 | 765      | 2896 | 152<br>9 | 22,64,628   | 3.96  | 13050 | 2189      | 1,073 | 180       |
| Injuries                | 19,93,646   | 1.67  | 1522 | 730      | 3045 | 146<br>0 | 46,19,876   | 8.07  | 26242 | 6000      | 2,157 | 493       |
| Others                  | 28,92,298   | 2.42  | 655  | 426      | 1310 | 853      | 12,97,049   | 2.27  | 30196 | 6666      | 2,482 | 548       |
| Childbirth              | 1,46,562    | 0.12  | 585  | 398      | 1169 | 797      | 1,56,17,000 | 27.29 | 8508  | 1729      | 699   | 142       |
